# Supplementary material for: Isoliquiritigenin attenuates myocardial ischemia reperfusion through autophagy activation mediated by AMPK/mTOR/ULK1 signaling
Source: PubMed Central journal article supplement — BMC Cardiovasc Disord. 2024 Aug 9;24:415. doi: 10.1186/s12872-024-04054-z (PMC11311884; doi:10.1186/s12872-024-04054-z), 2024-08-09

Figure legend

**Figure 1A-D:** Beclin1, P62, and LC3 expression of non-infarcted areas of rat myocardial tissues

**Figure E-H:** Beclin1, P62, and LC3 expression of H9c2 cells

**Figure I-P:** AMPK, p-AMPK, mTOR, p-mTOR, ULK1, p-ULK1(S757), and p-ULK1(S555) expression in H9c2 cells

**Figure Q-W:** AMPK, p-AMPK, mTOR, p-mTOR, ULK1, and p-ULK1(S757) expression of non-infarcted areas of rat myocardial tissues

**Figure 2A-D:** Beclin1, P62, and LC3 expression of infarcted areas of rat myocardial tissues

**Figure 2E-K:** AMPK, p-AMPK, mTOR, p-mTOR, ULK1, and p-ULK1(S757) expression of infarcted areas of rat myocardial tissues

1A: LC3 expression of non-infarcted areas of rat myocardial tissues

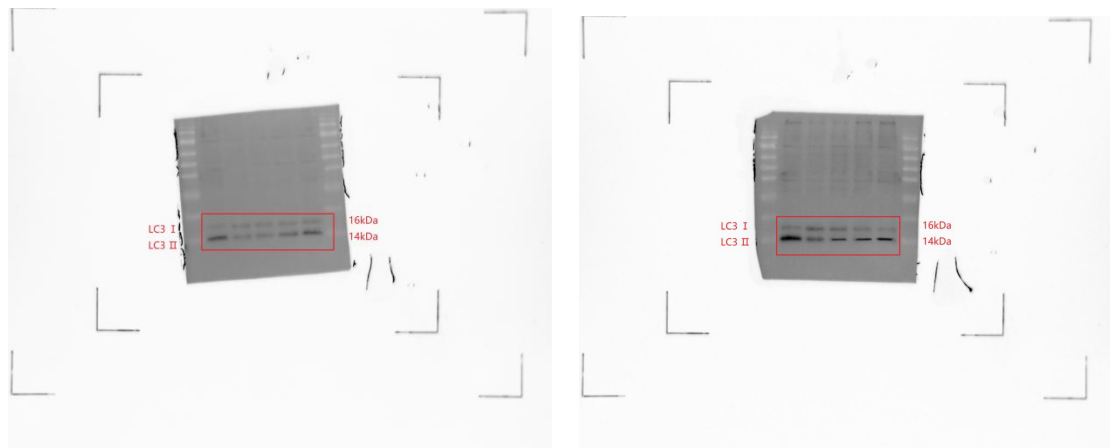

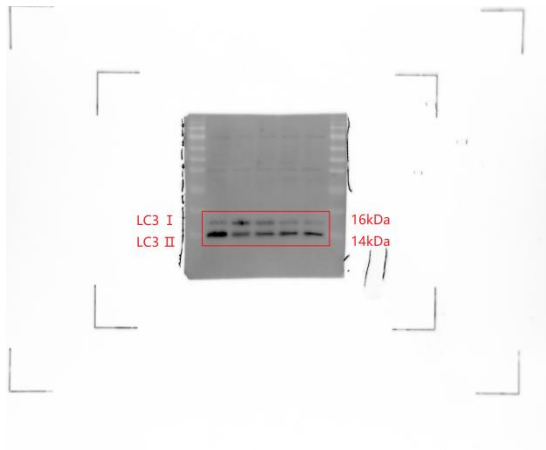

### B: P62 expression of non-infarcted areas of rat myocardial tissues

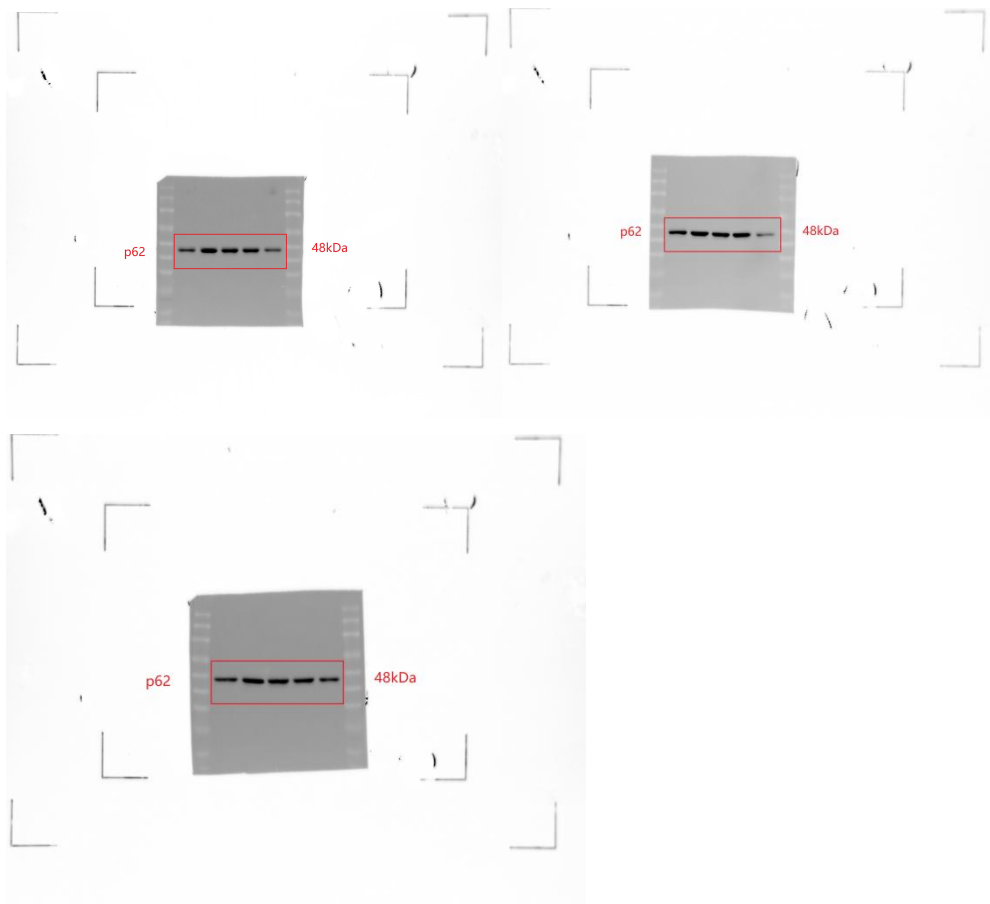

### C: Beclin1 expression of non-infarcted areas of rat myocardial tissues

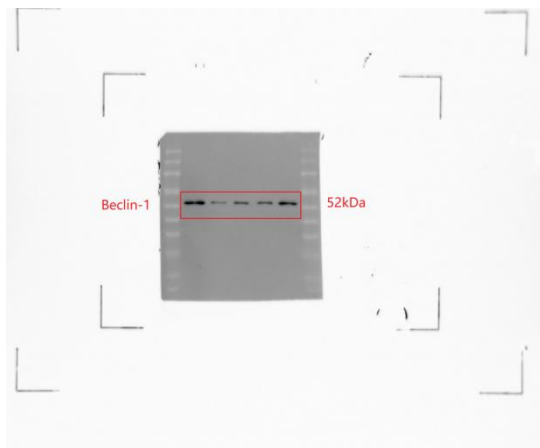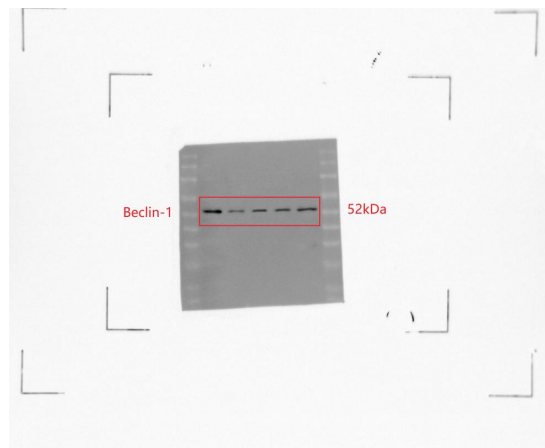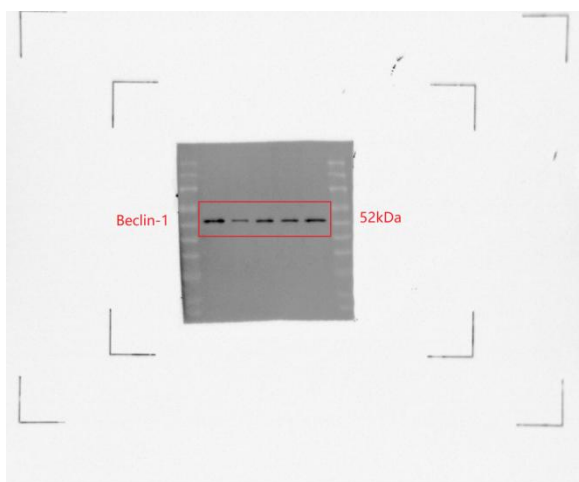

**D: GAPDH expression of non-infarcted areas of rat myocardial tissues**

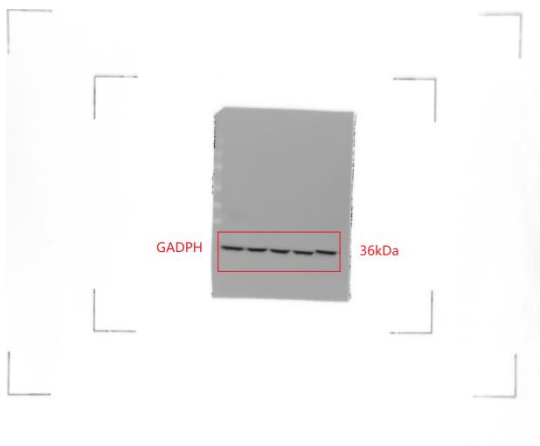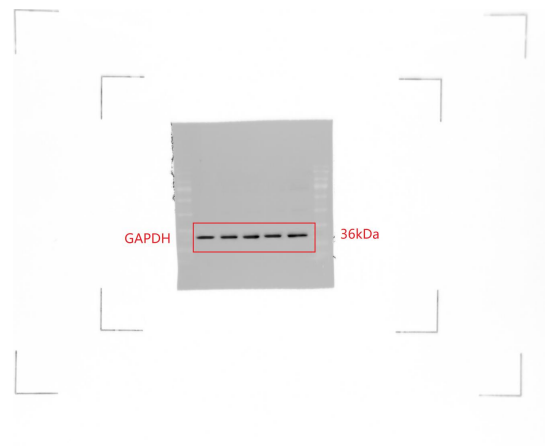

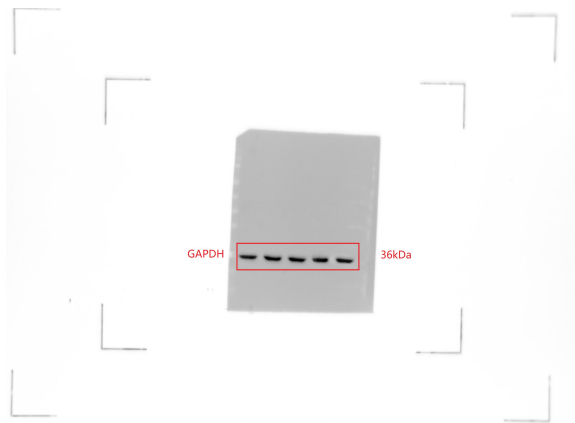

E: P62 expression of H9c2 cells

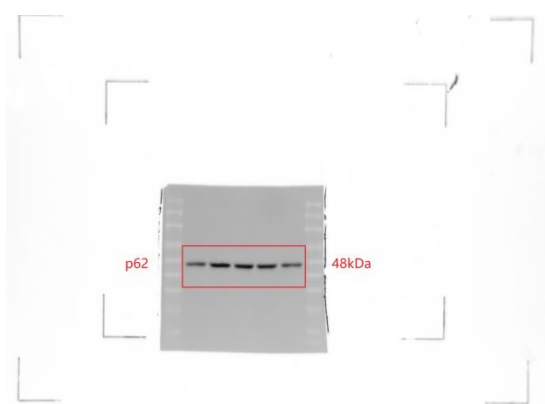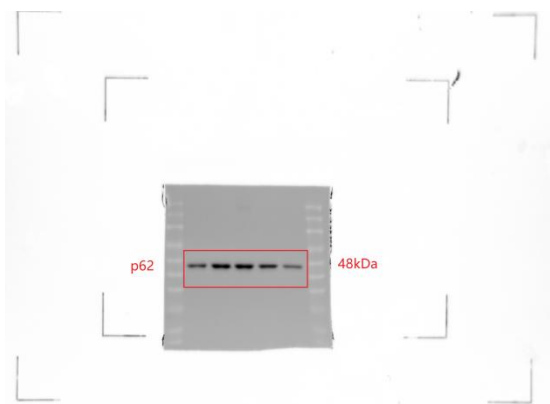

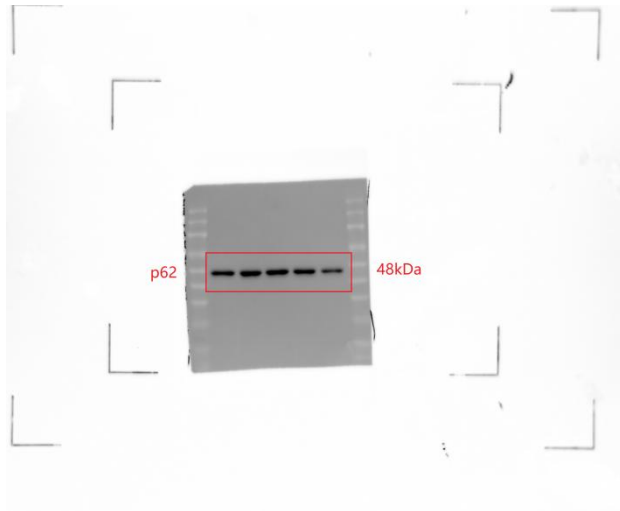

F: Beclin1 expression of H9c2 cells

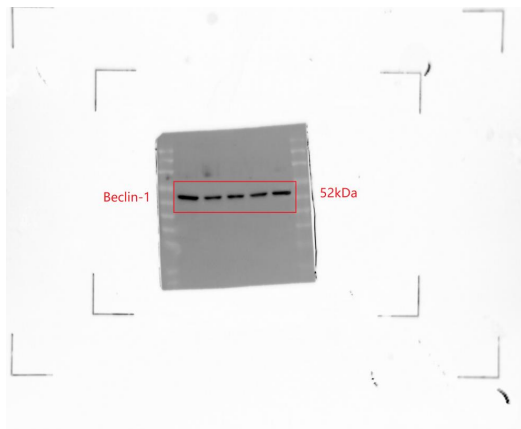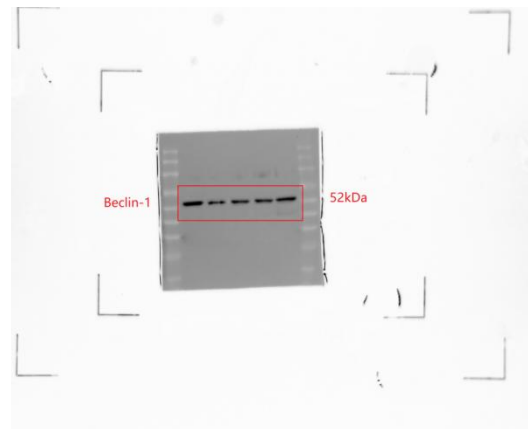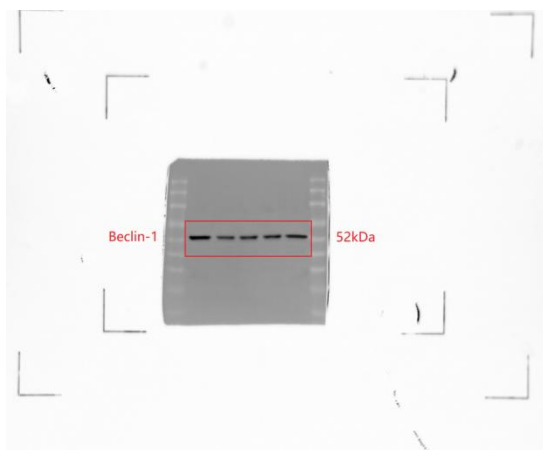

G: GAPDH expression of H9c2 cells

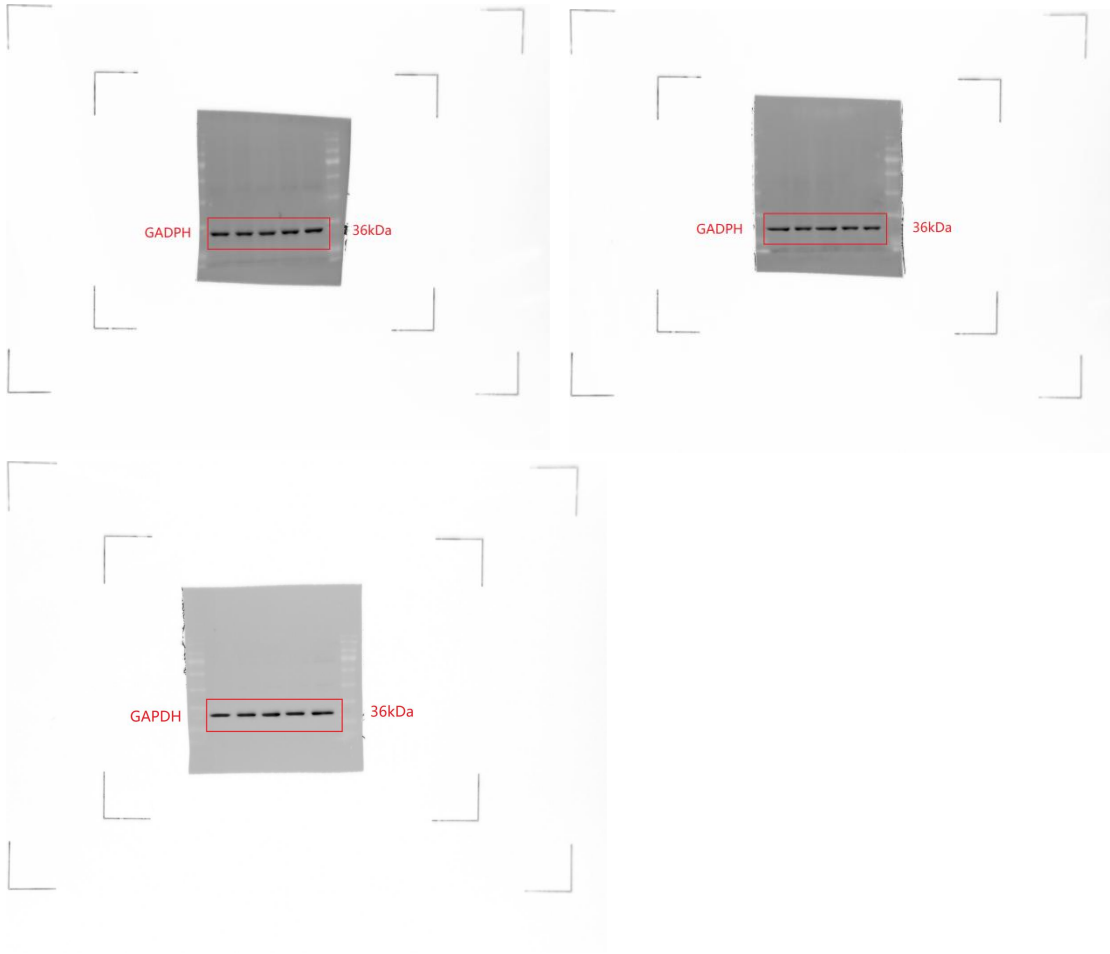

H: LC3 expression of H9c2 cells

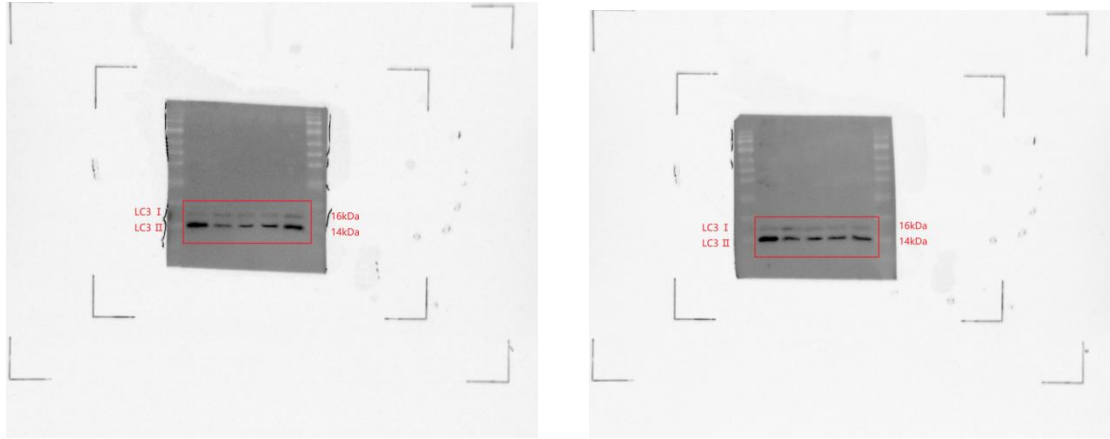

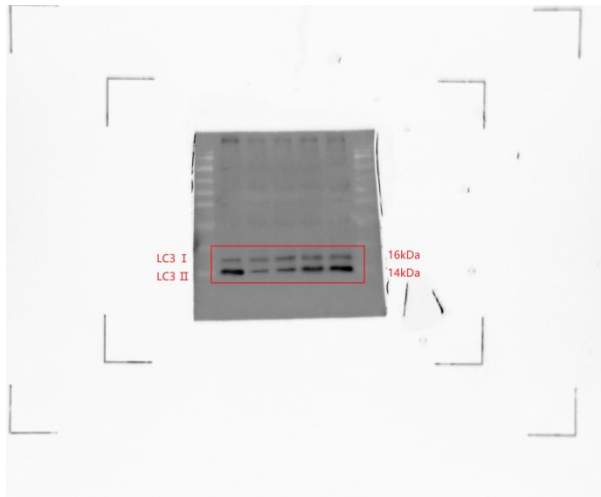

I: p-ULK1(S555) expression in H9c2 cells

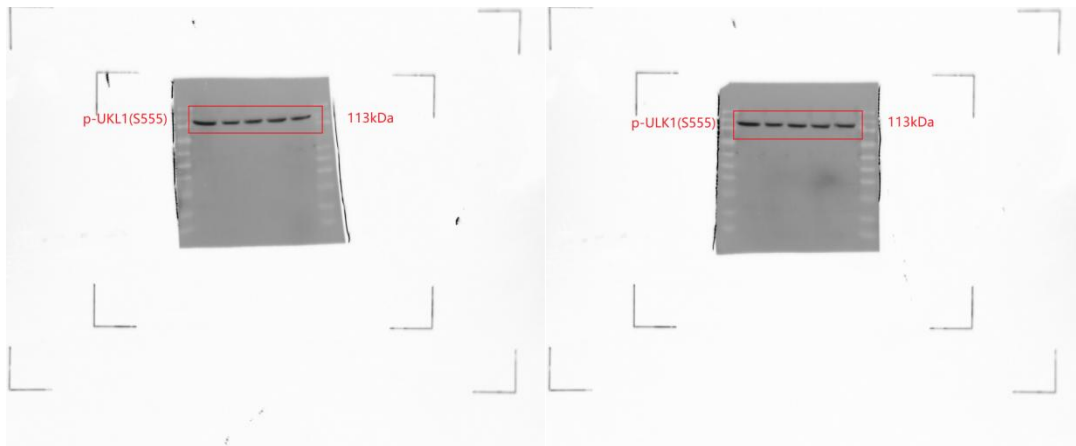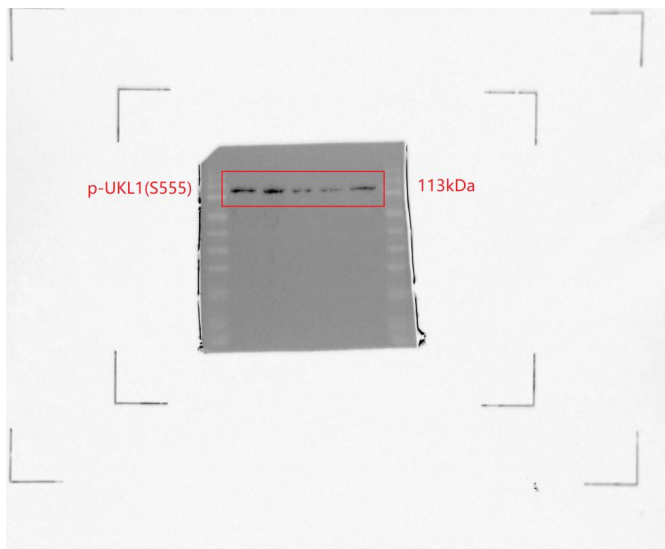

J: p-ULK1(S757) expression in H9c2 cells

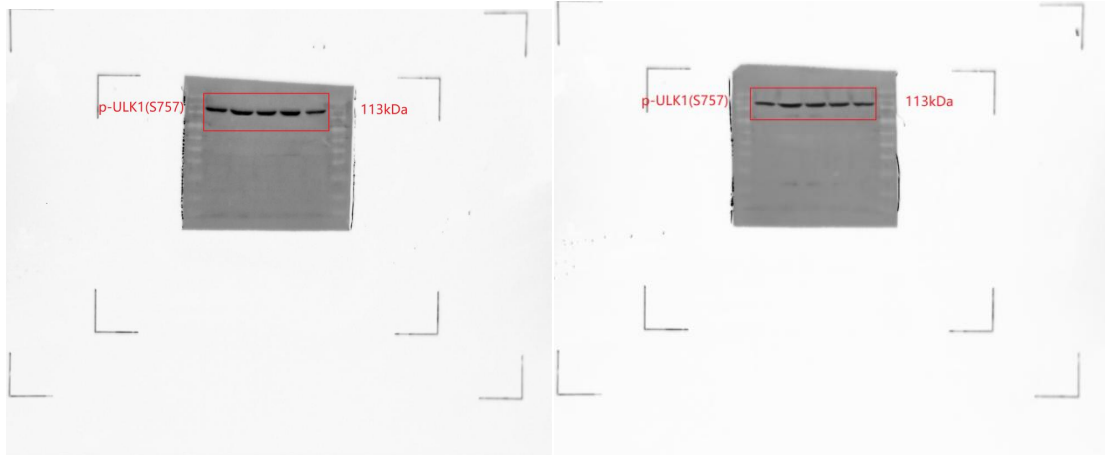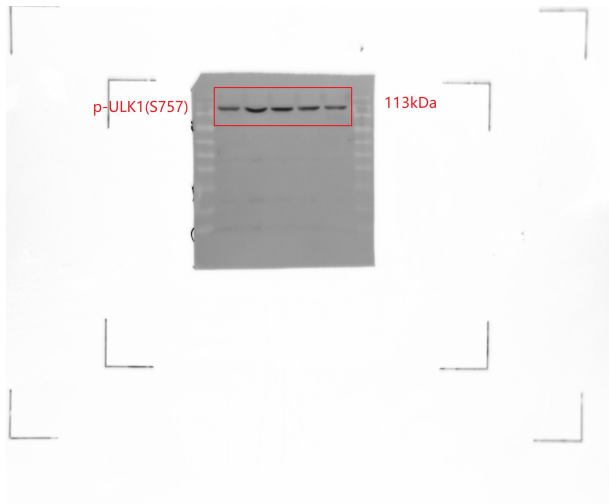

**K: ULK1 expression in H9c2 cells**

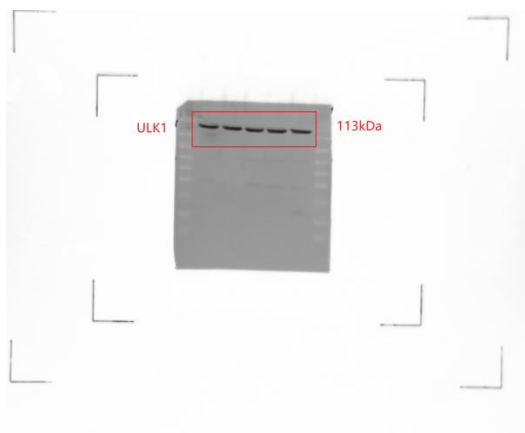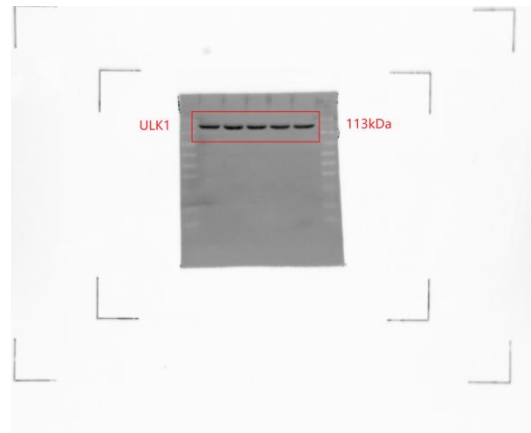



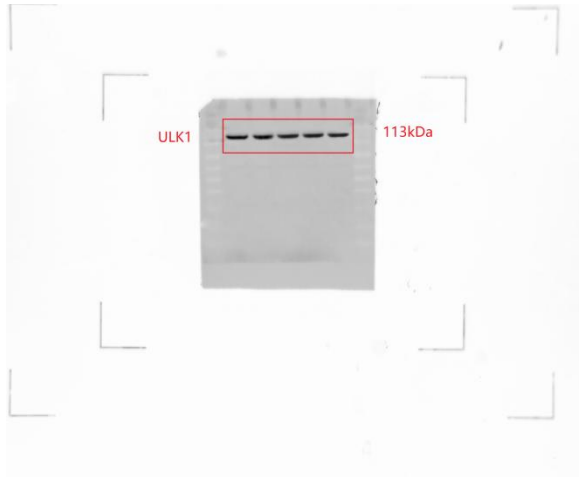

L: p-mTOR expression in H9c2 cells

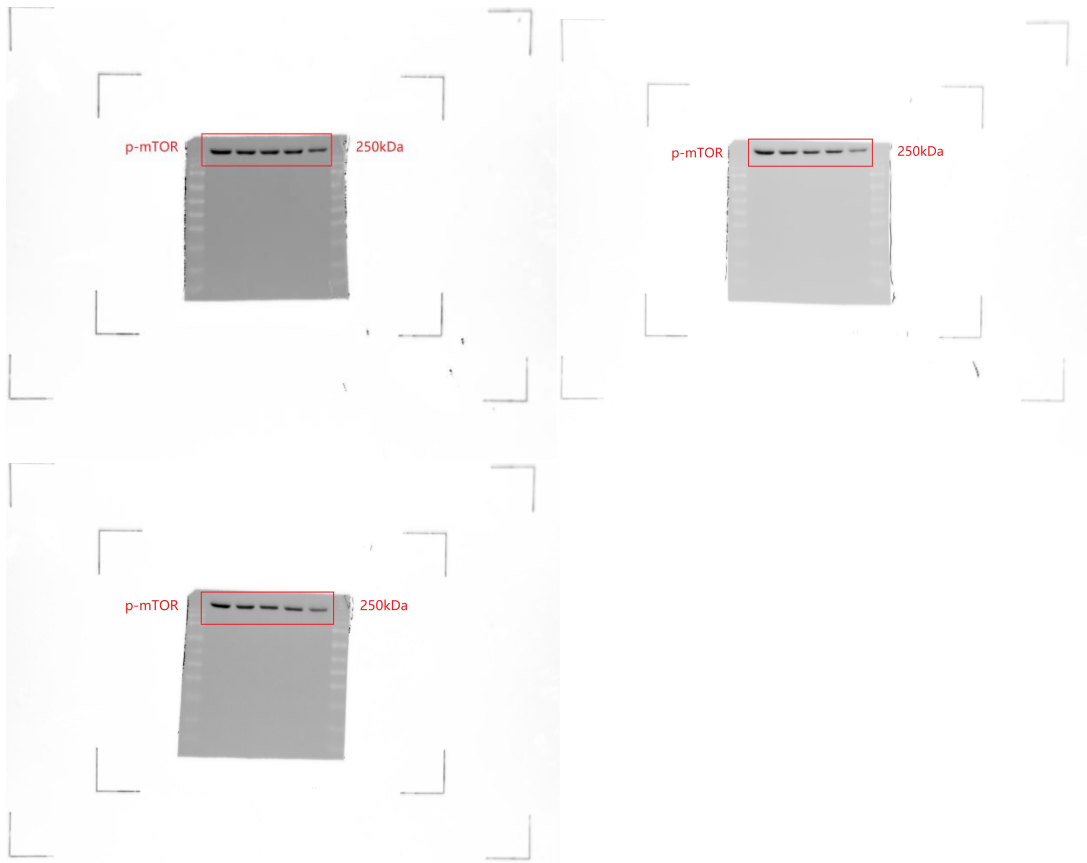

M: mTOR expression in H9c2 cells

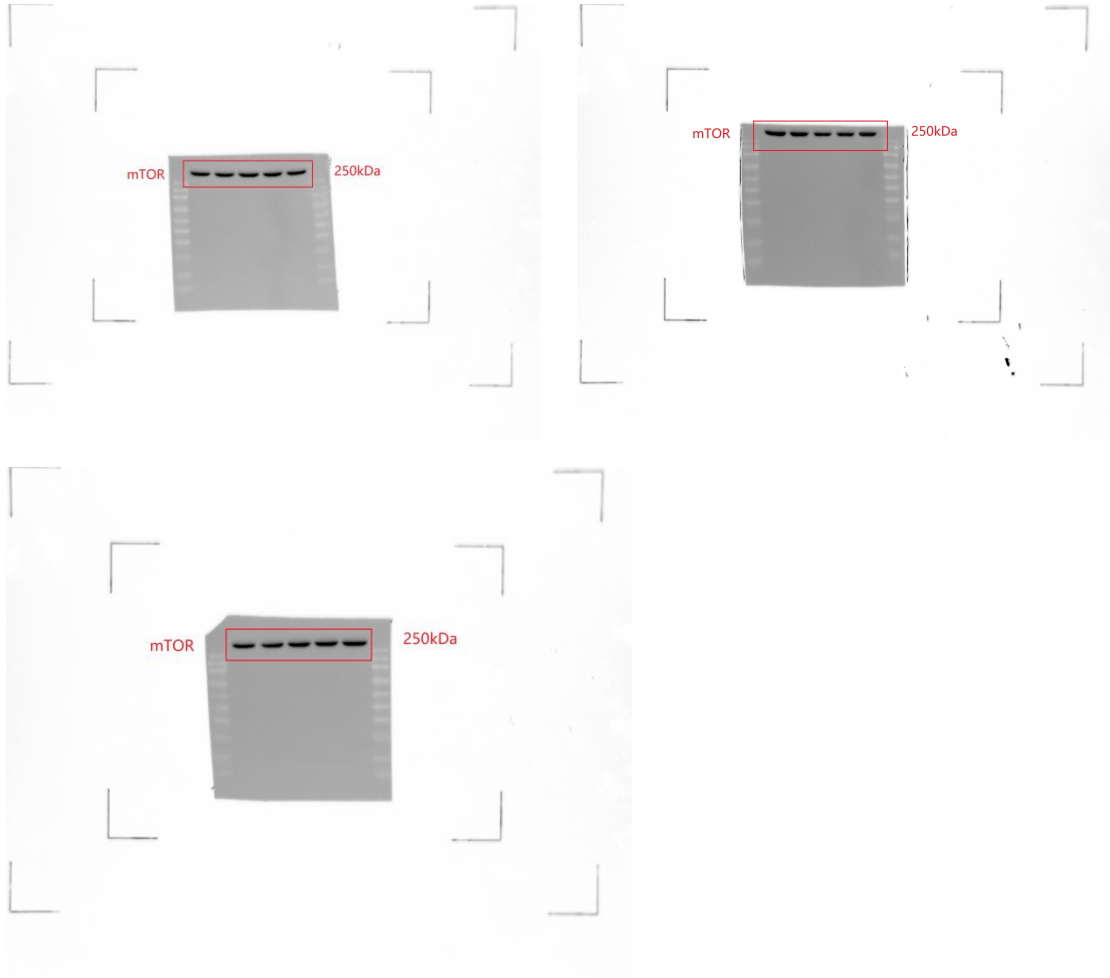

N: p-AMPK expression in H9c2 cells

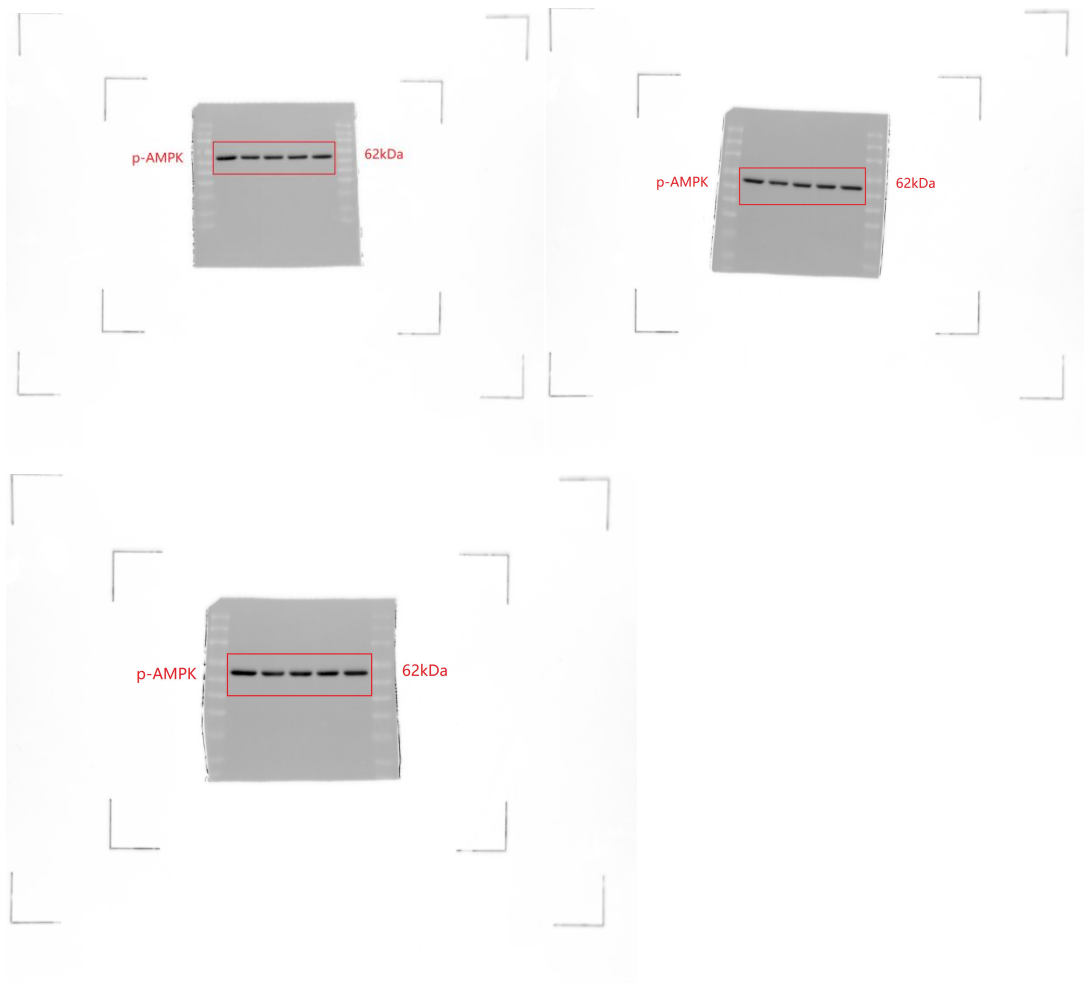

O: AMPK expression in H9c2 cells

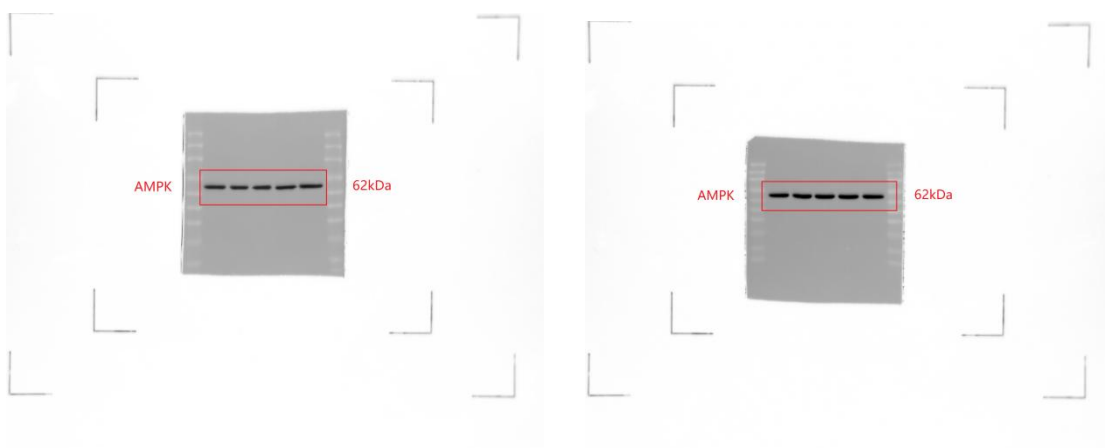

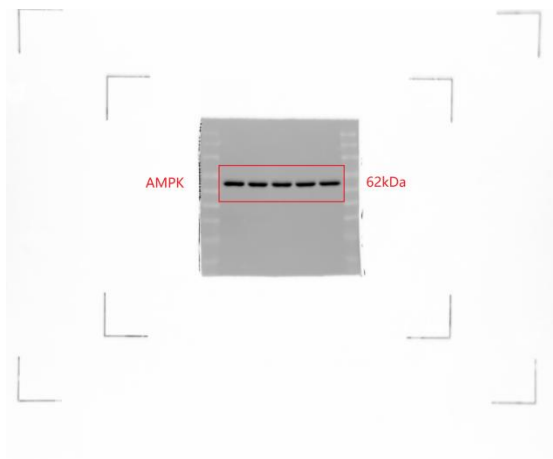

**P: GAPDH expression in H9c2 cells**

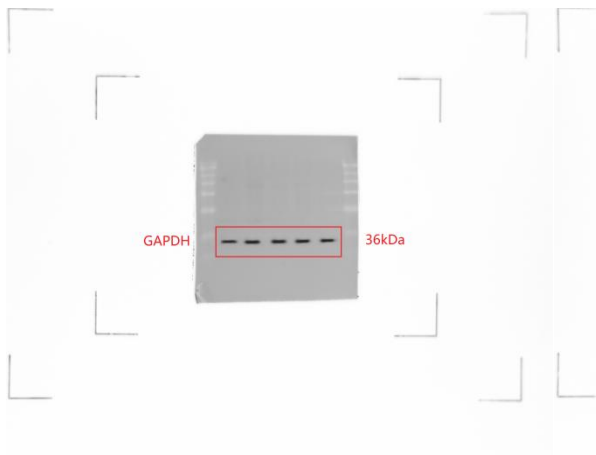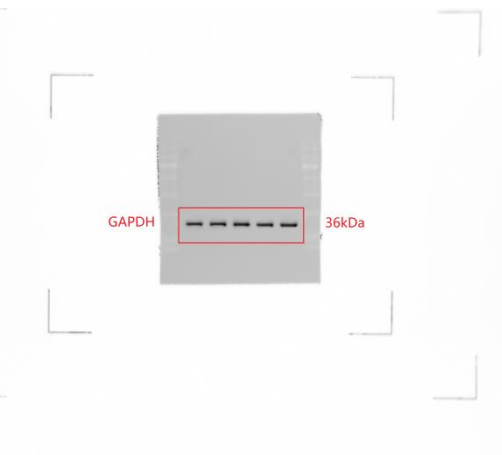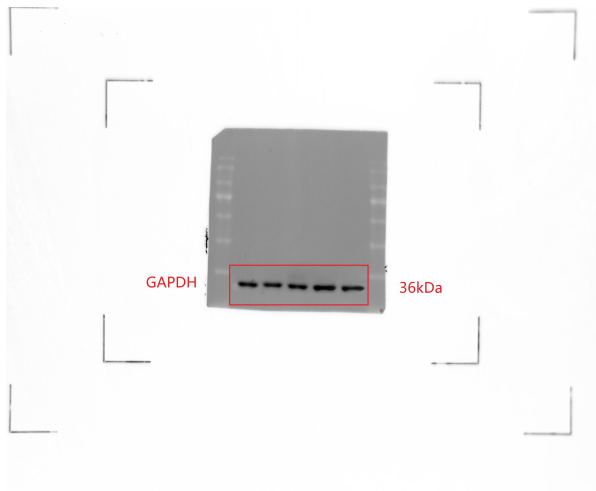

Q: ULK1 expression of non-infarcted areas of rat myocardial tissues

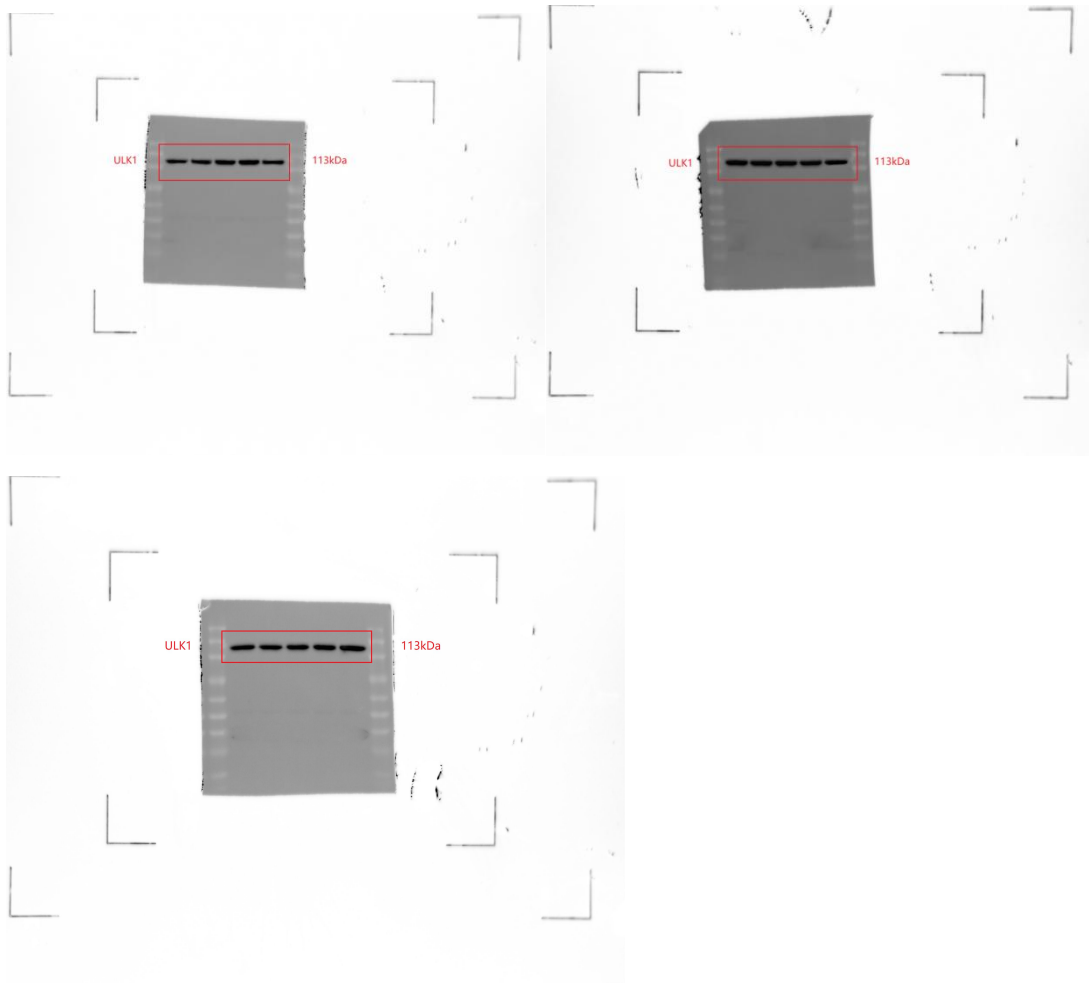

R: p-ULK1(S757) expression of non-infarcted areas of rat myocardial tissues

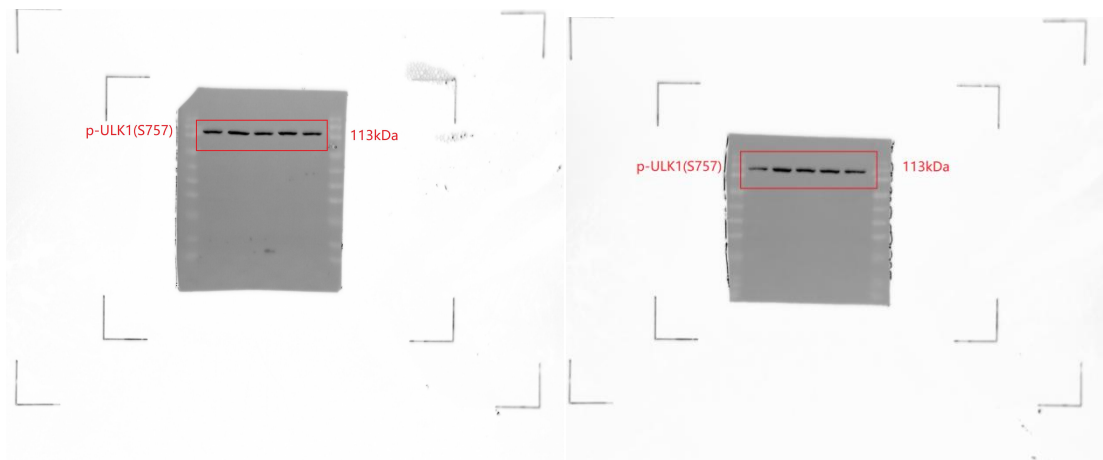

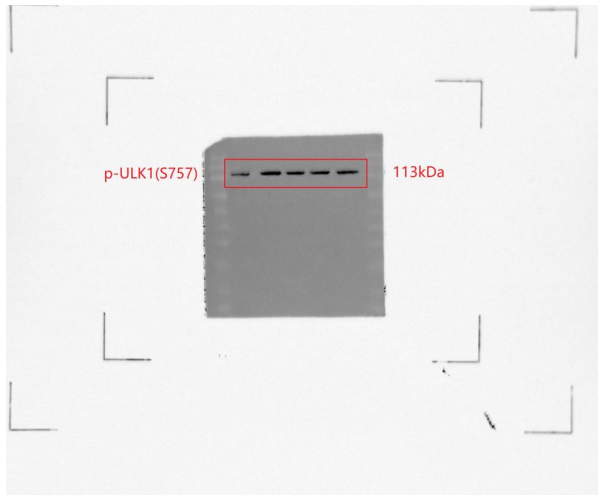

S: p-mTOR expression of non-infarcted areas of rat myocardial tissues

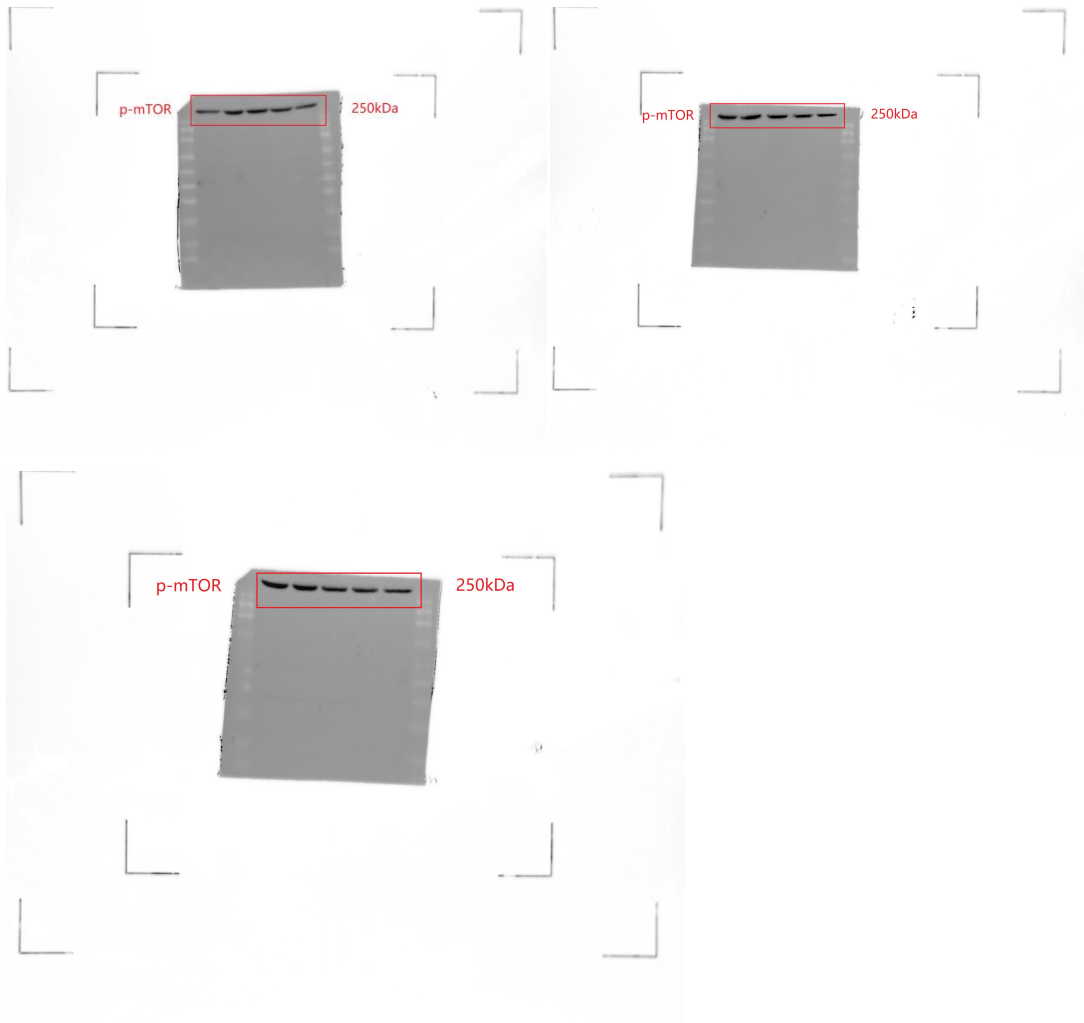

T: mTOR expression of non-infarcted areas of rat myocardial tissues

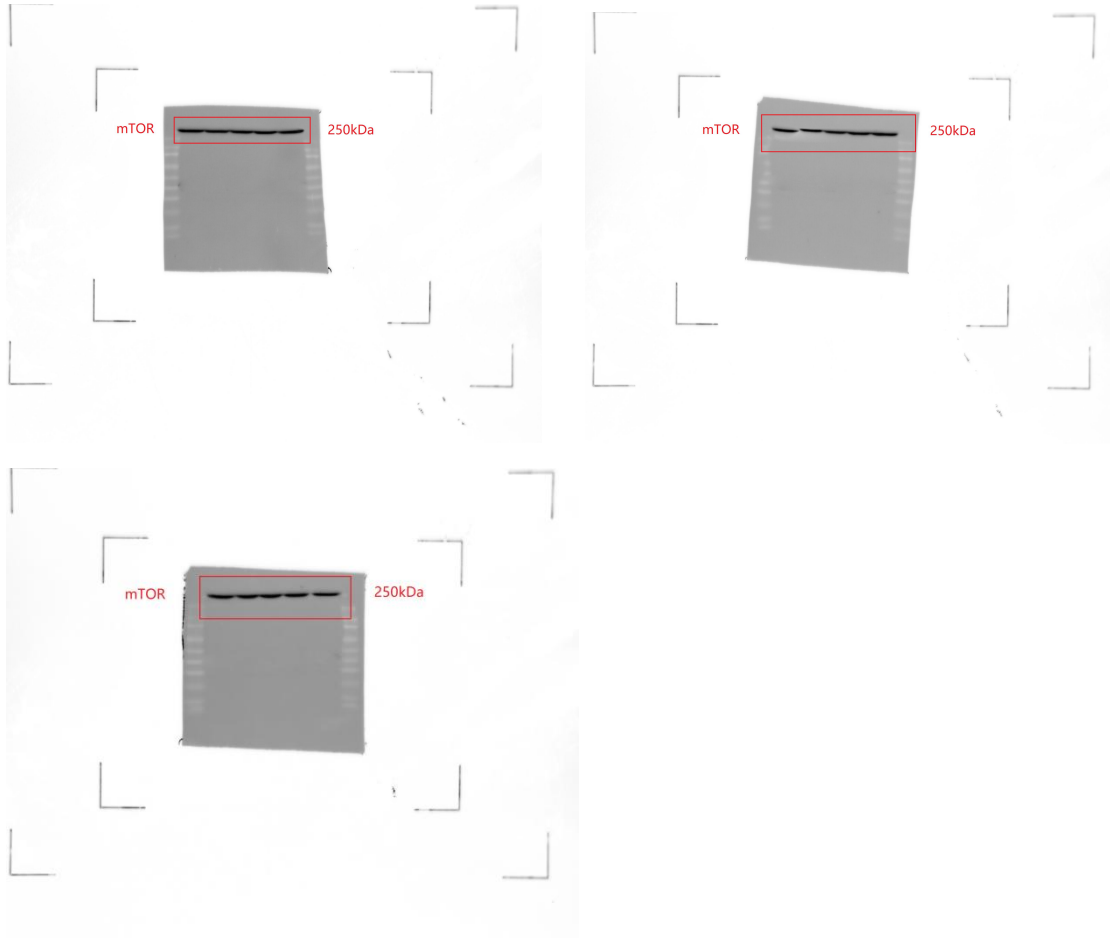

U: AMPK expression of non-infarcted areas of rat myocardial tissues

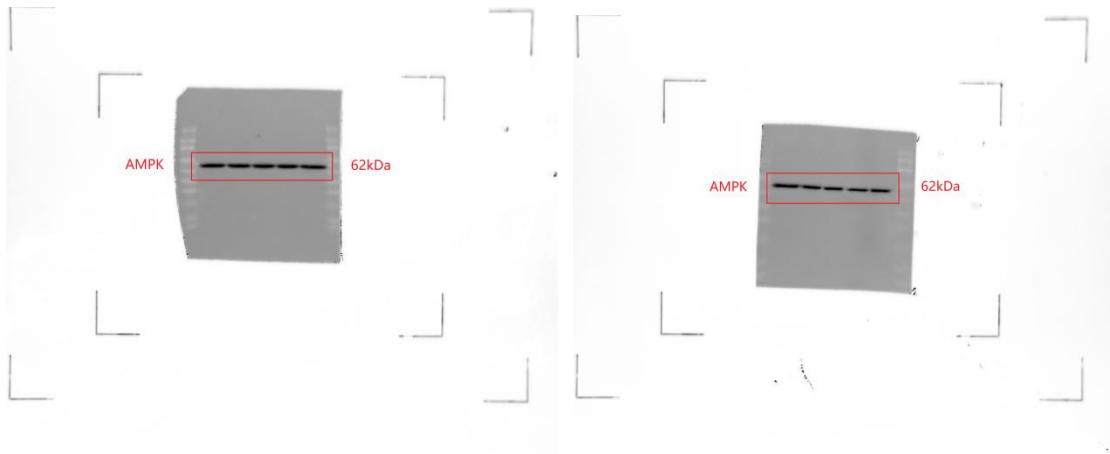

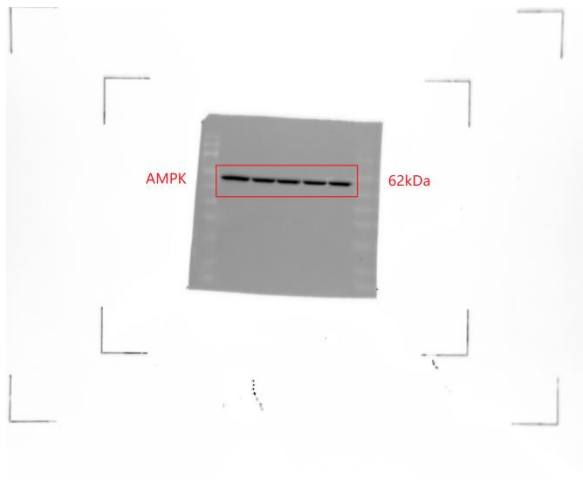

V: p-AMPK expression of non-infarcted areas of rat myocardial tissues

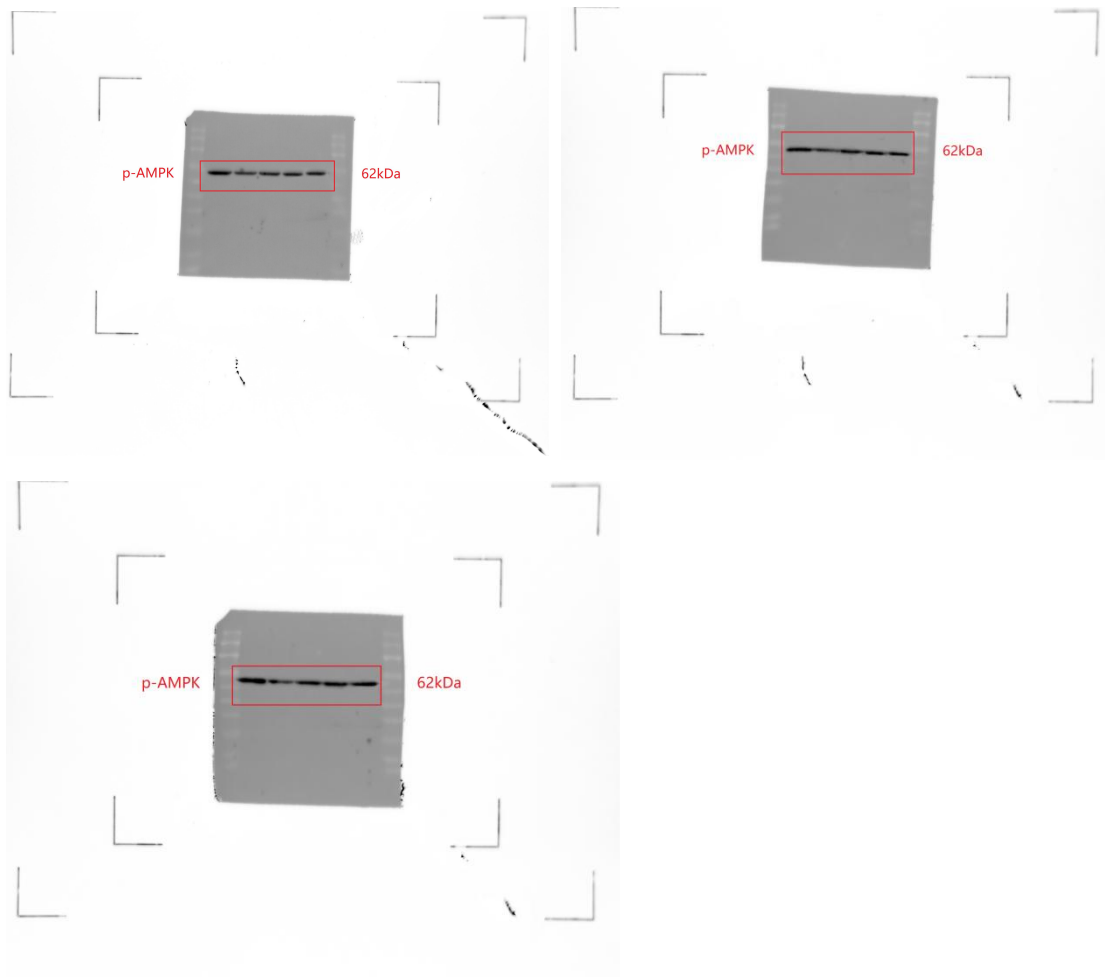



W: GAPDH expression of non-infarcted areas of rat myocardial tissues

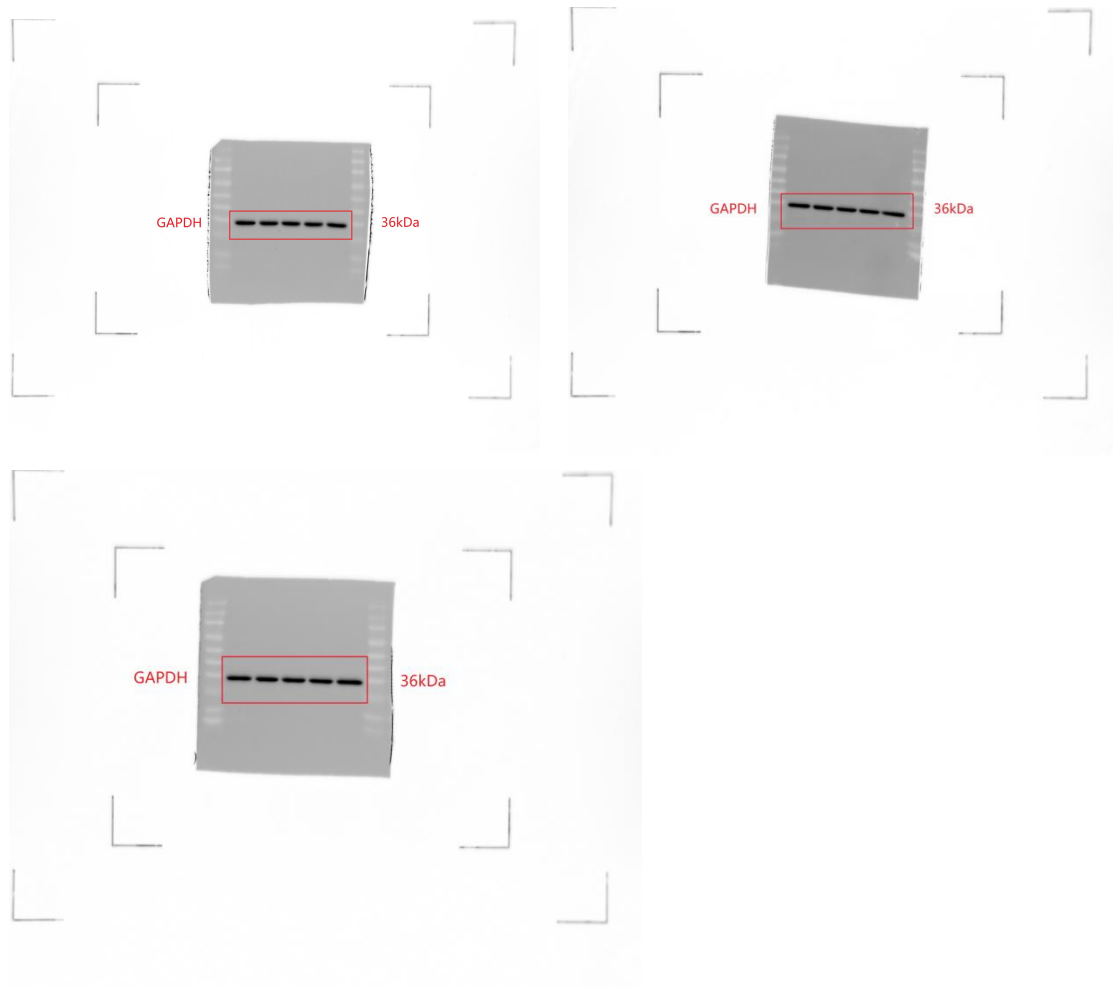

Figure 2A-D: Beclin1, P62, and LC3 expression of infarcted areas of rat myocardial tissues

Figure 2A: Beclin1 expression of infarcted areas of rat myocardial tissues

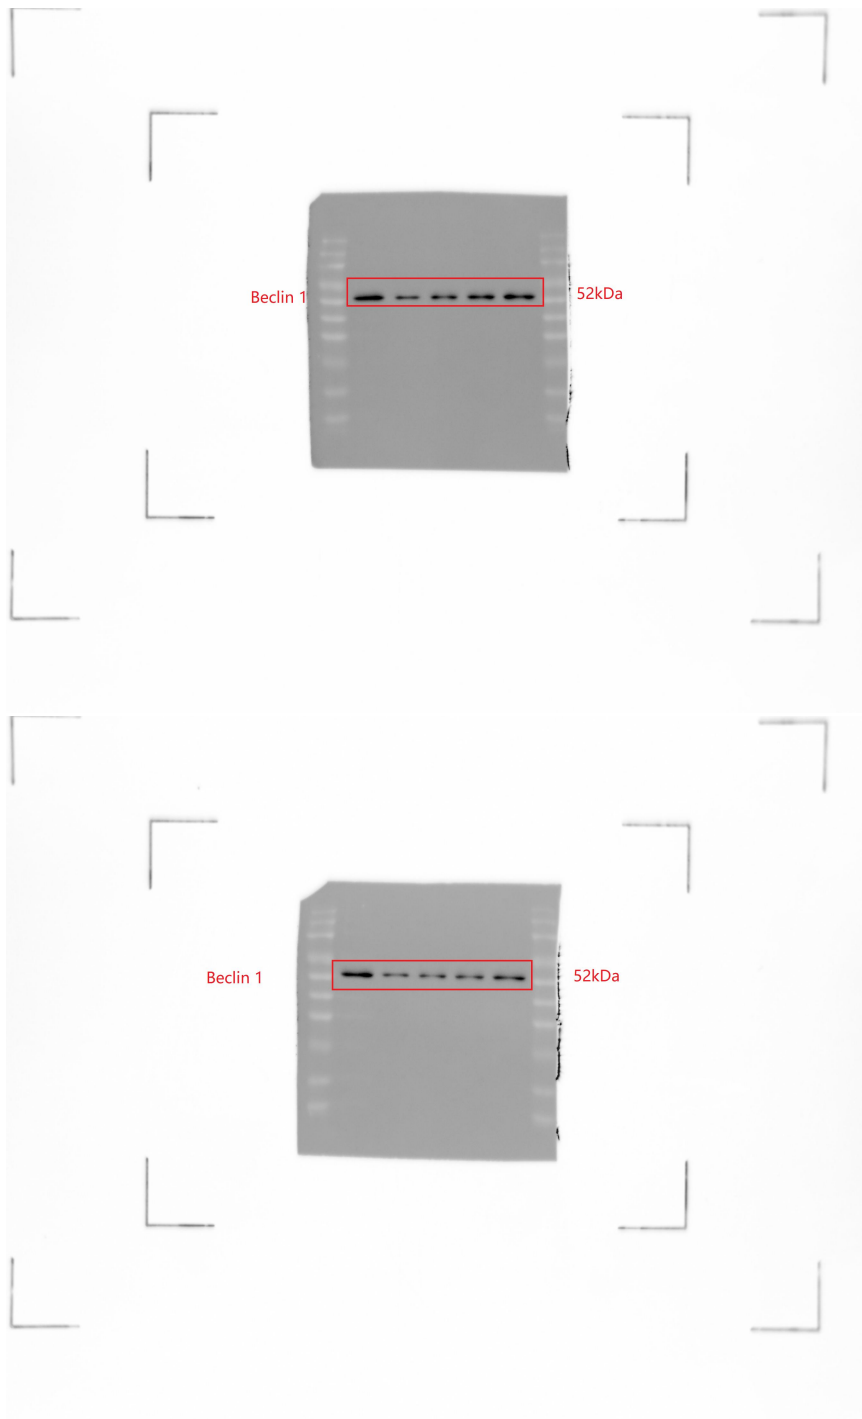

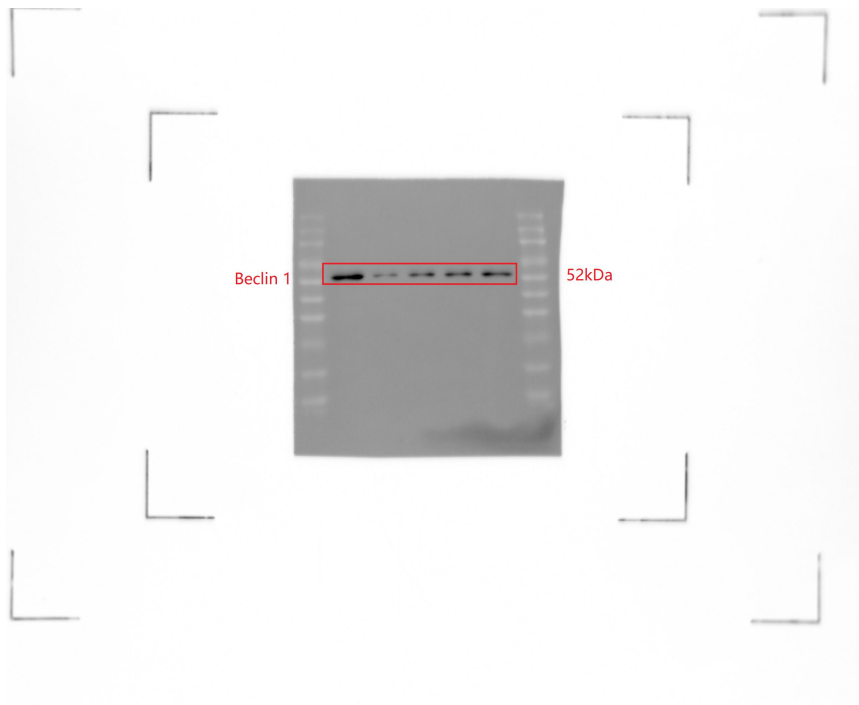

Figure 2B: P62 expression of infarcted areas of rat myocardial tissues

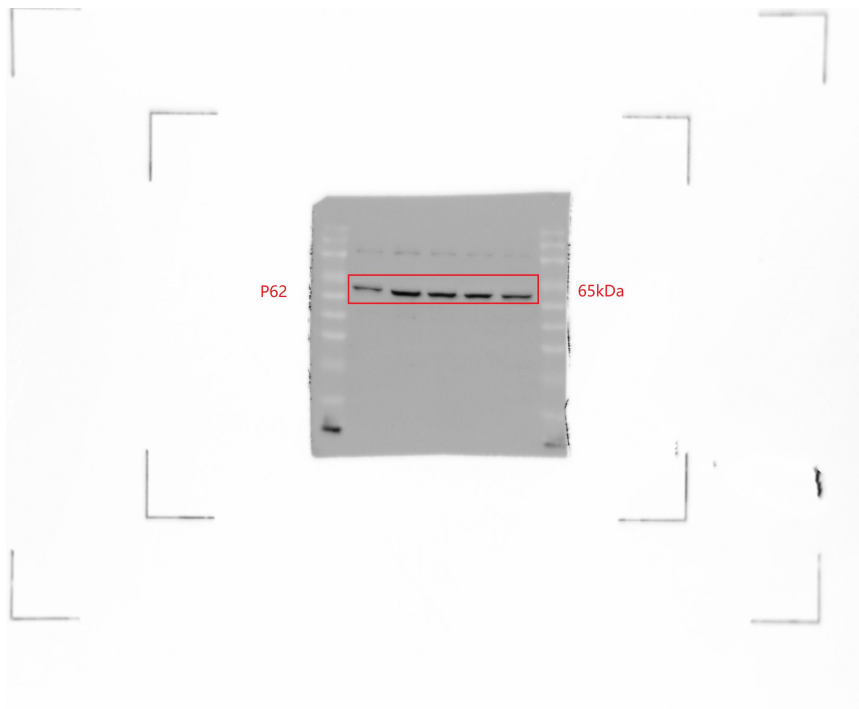

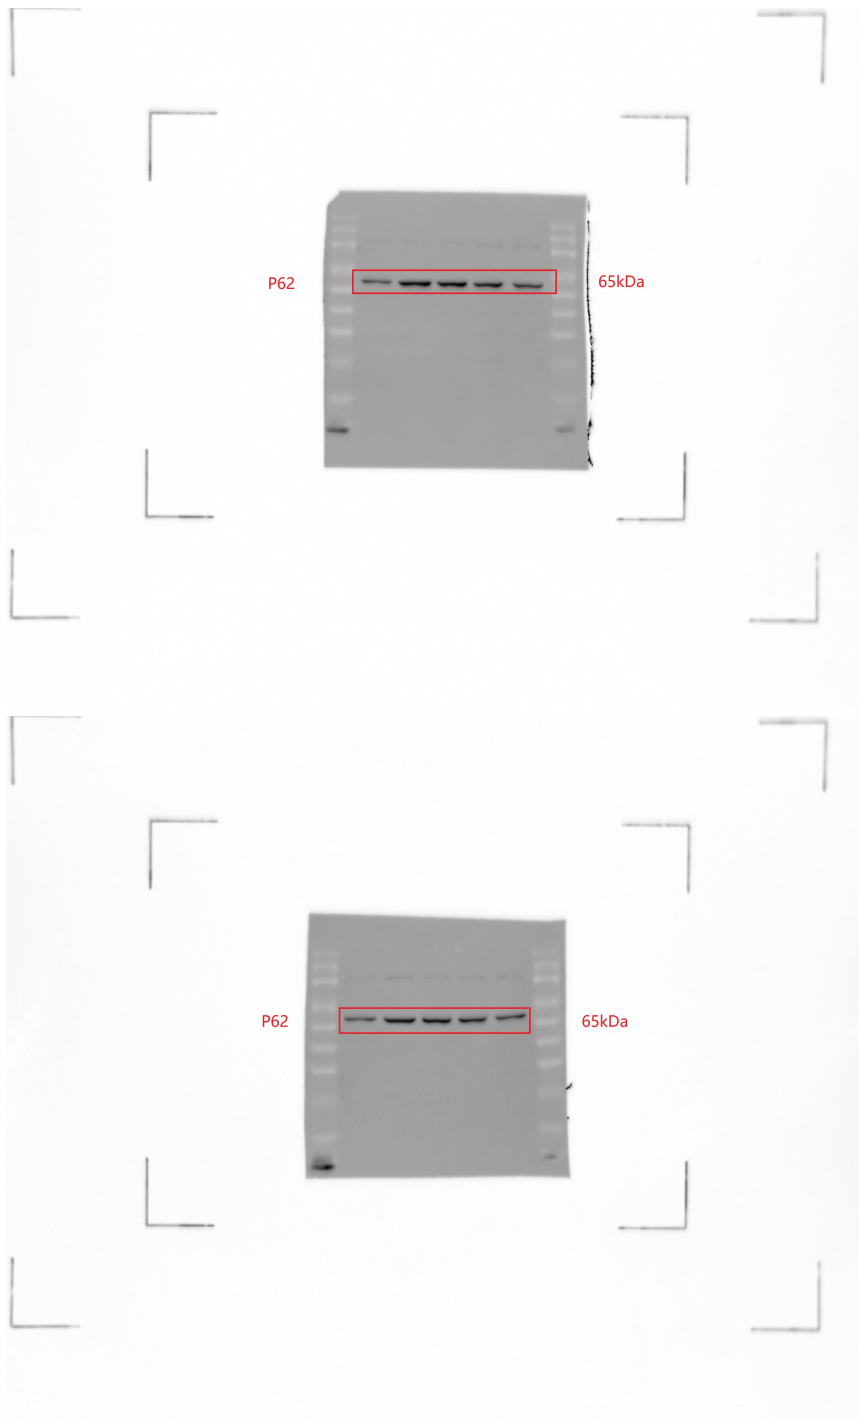

Figure 2C: LC3 expression of infarcted areas of rat myocardial tissues

LC3

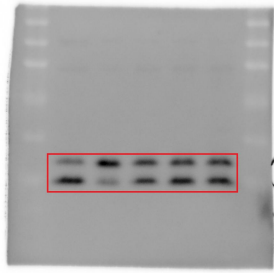

14,16kDa

LC3

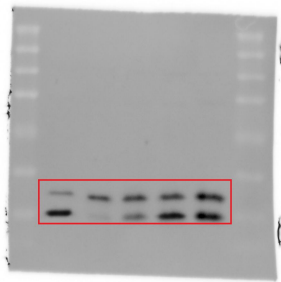

14,16kDa

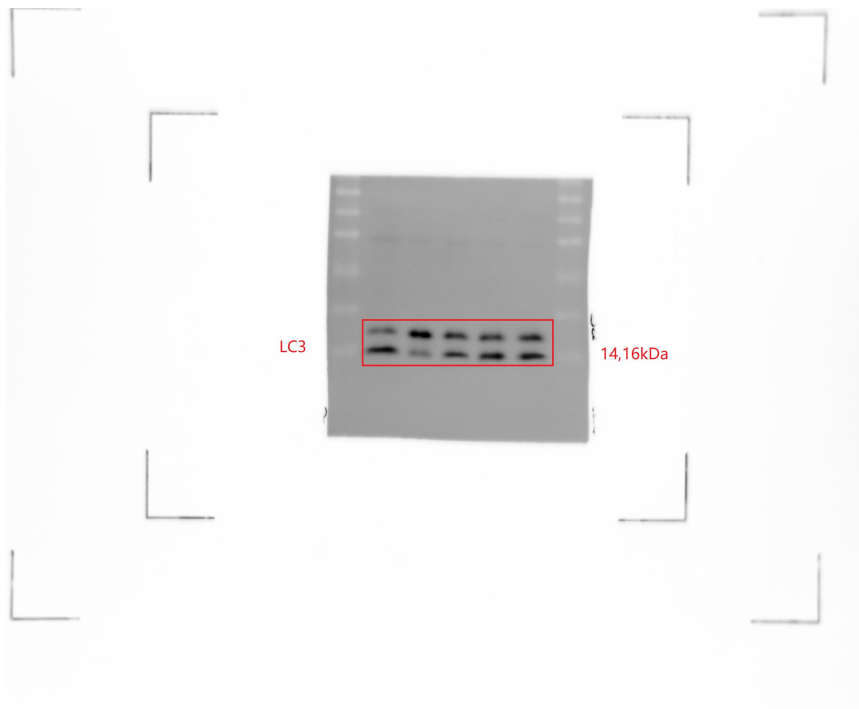

Figure 2D: GAPDH expression of infarcted areas of rat myocardial tissues

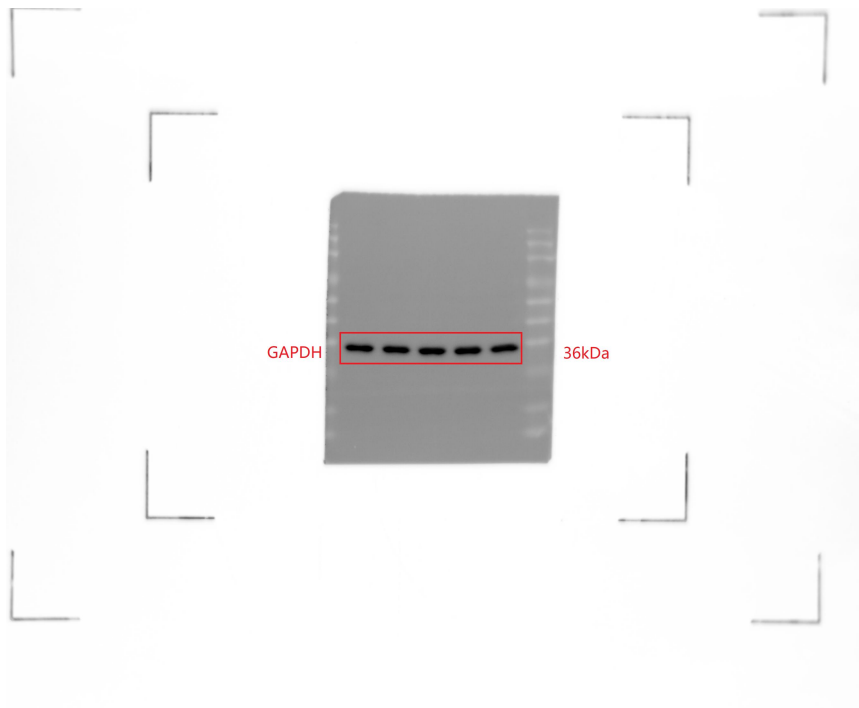

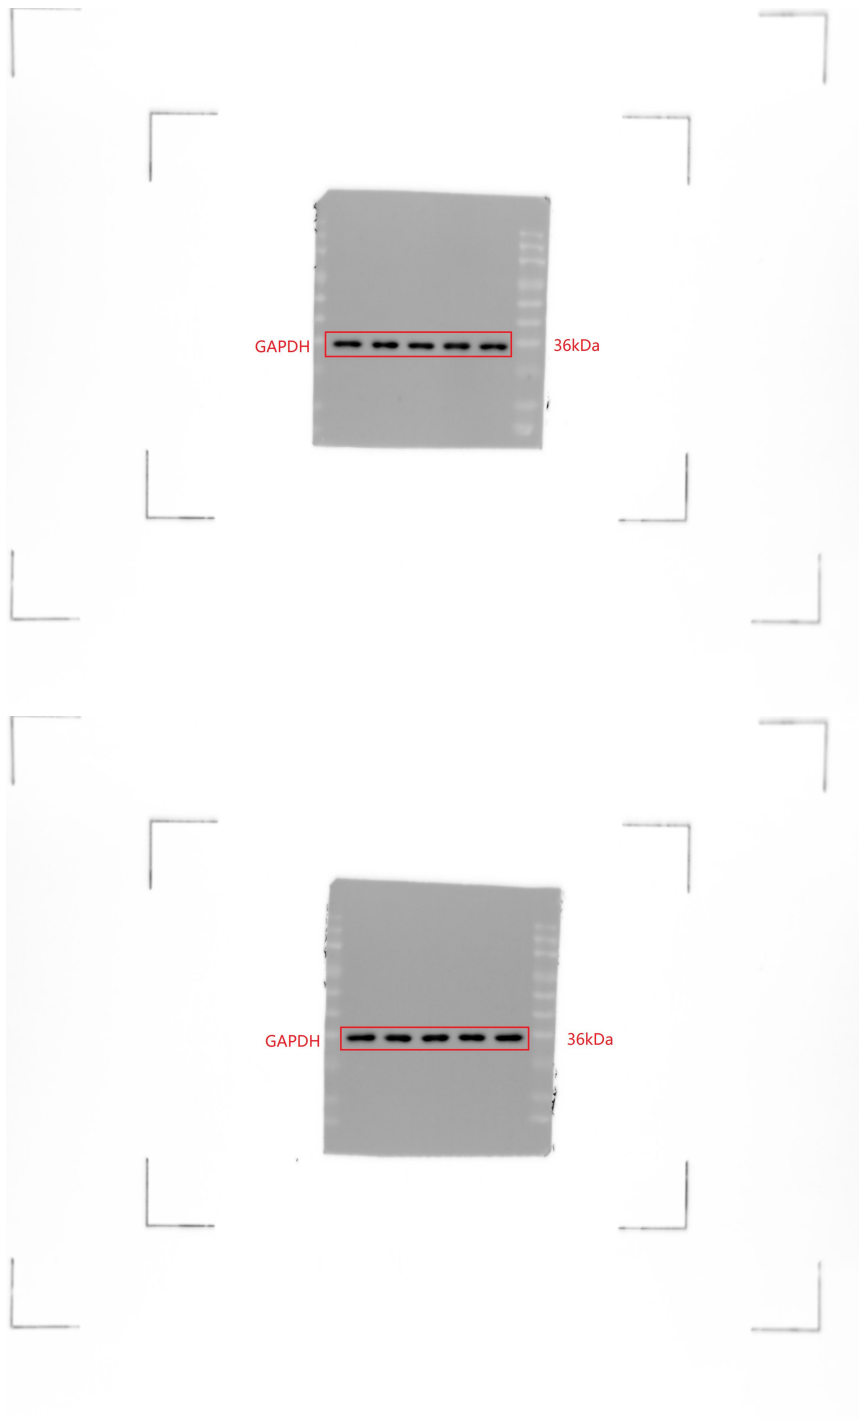

Figure 2E: AMPK expression of infarcted areas of rat myocardial tissues

AMPK 62kDa

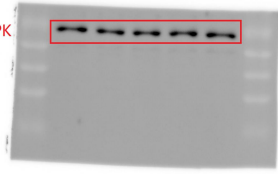

AMPK 62kDa

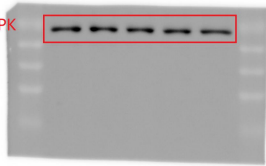



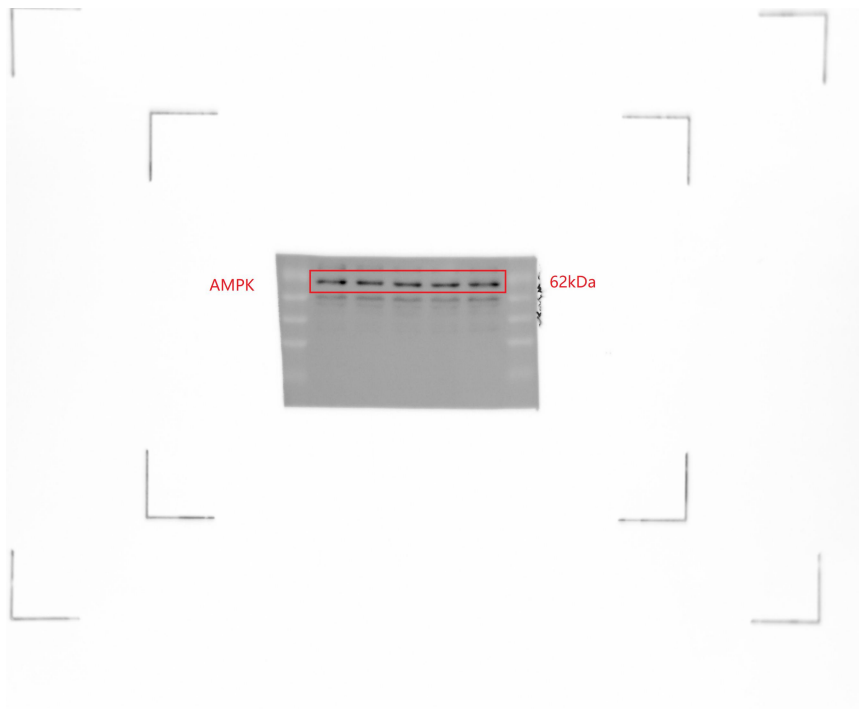

Figure 2F: p-AMPK expression of infarcted areas of rat myocardial tissues

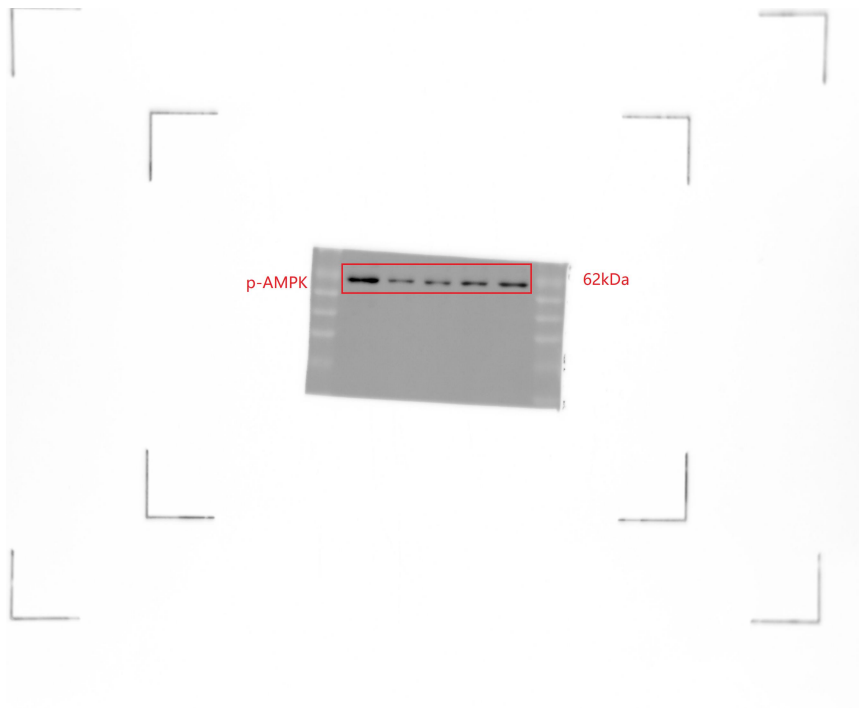

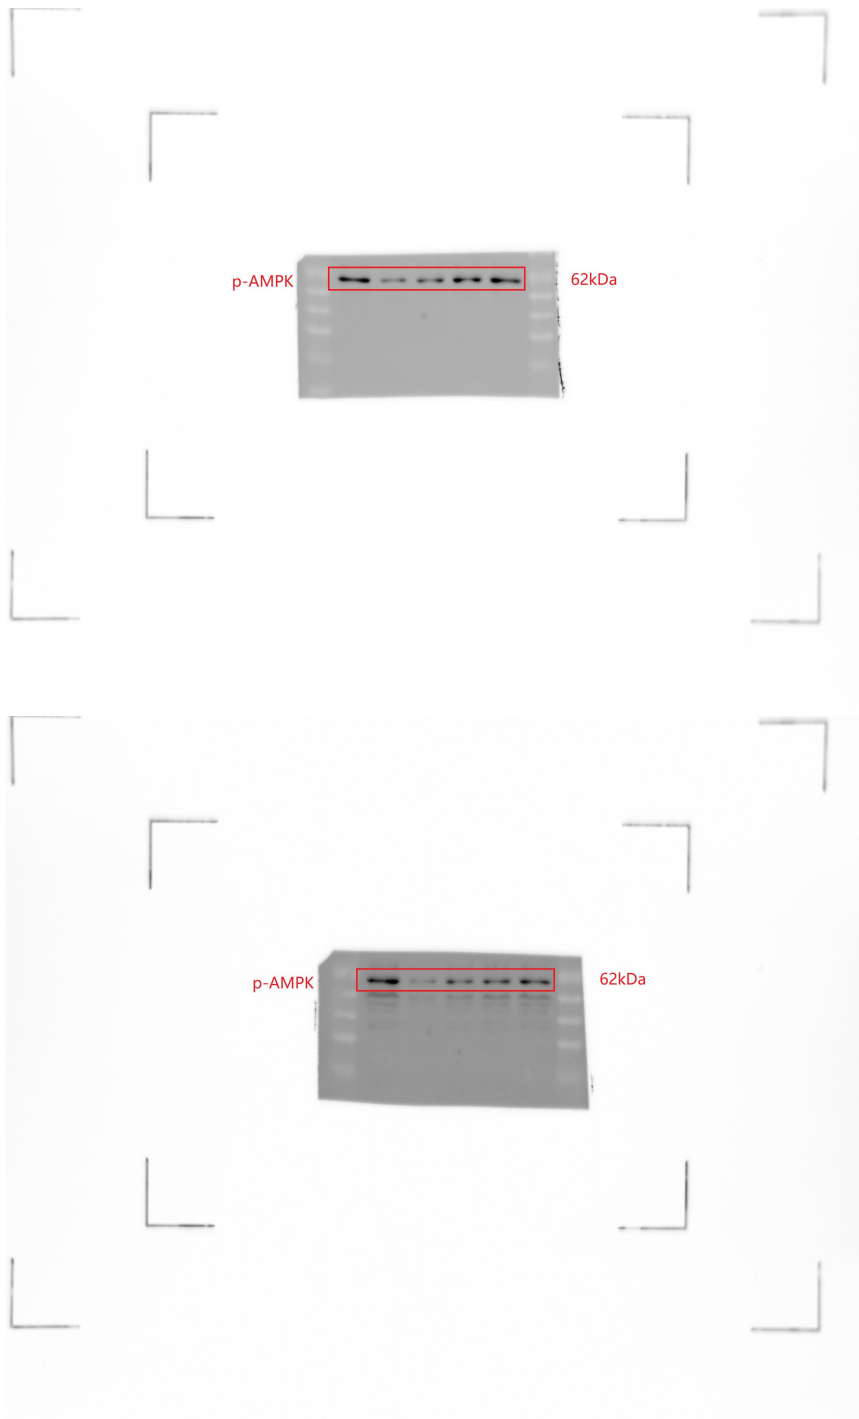

Figure 2G: mTOR expression of infarcted areas of rat myocardial tissues

p-mTOR

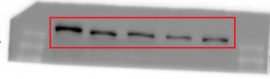

289kDa

mTOR

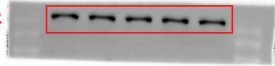

289kDa

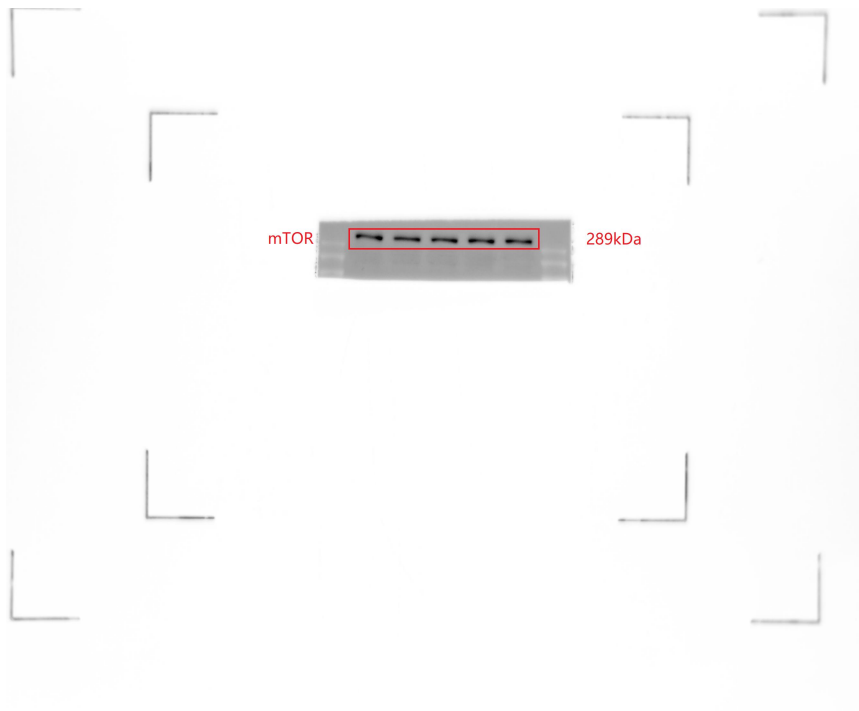

Figure 2H: p-mTOR expression of infarcted areas of rat myocardial tissues

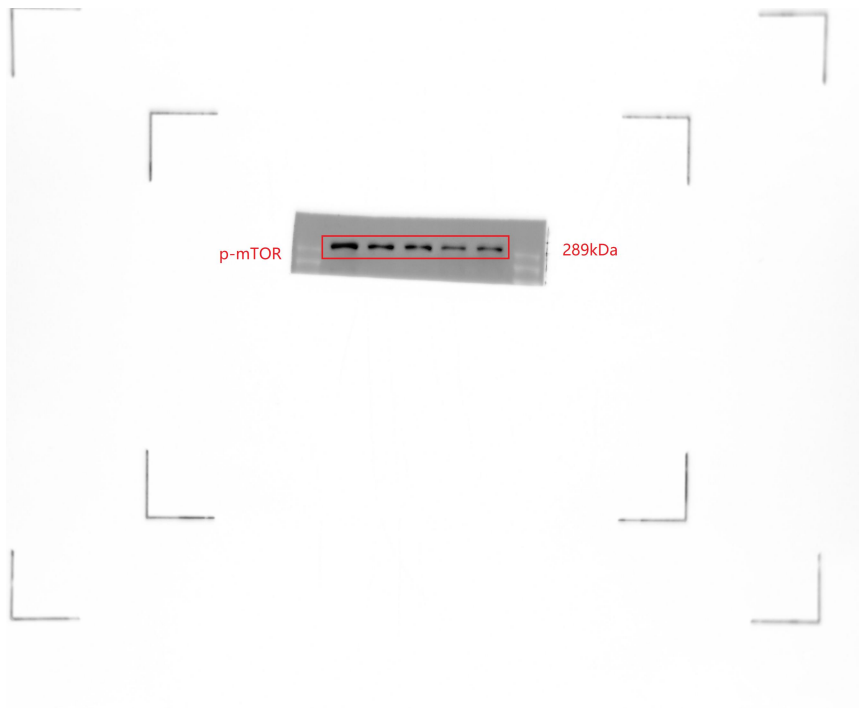

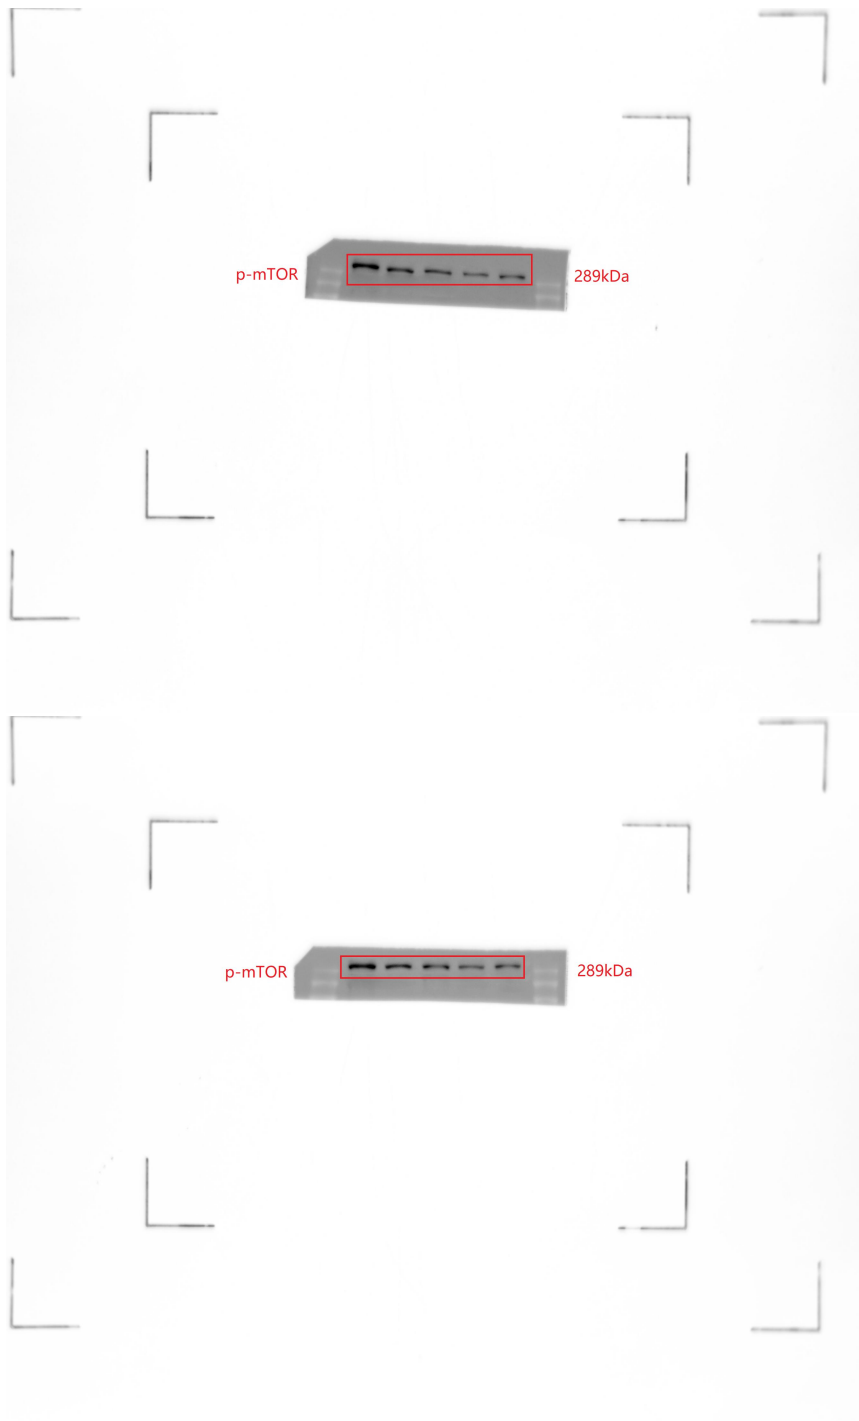

Figure 2I: ULK1 expression of infarcted areas of rat myocardial tissues

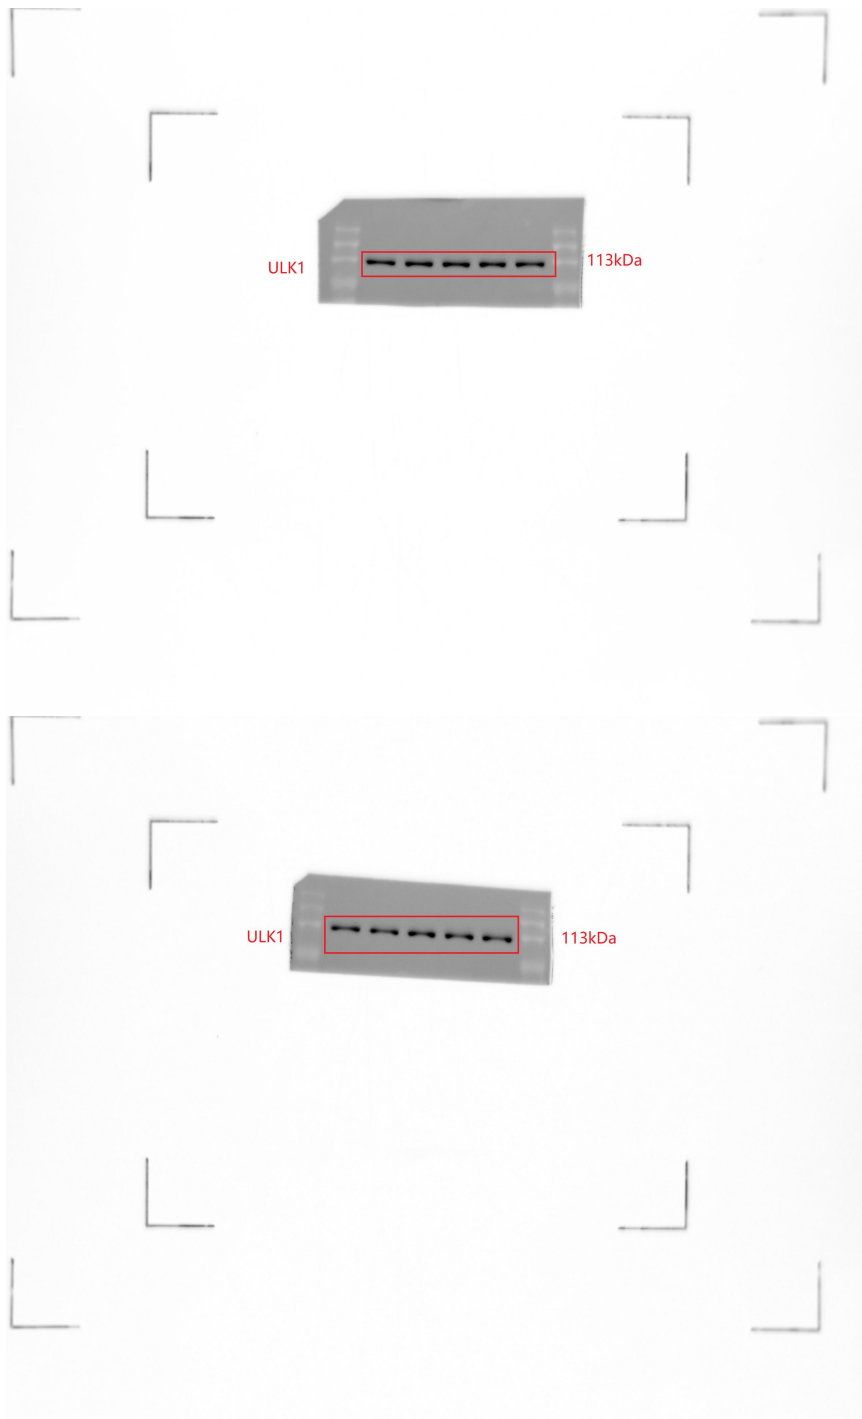

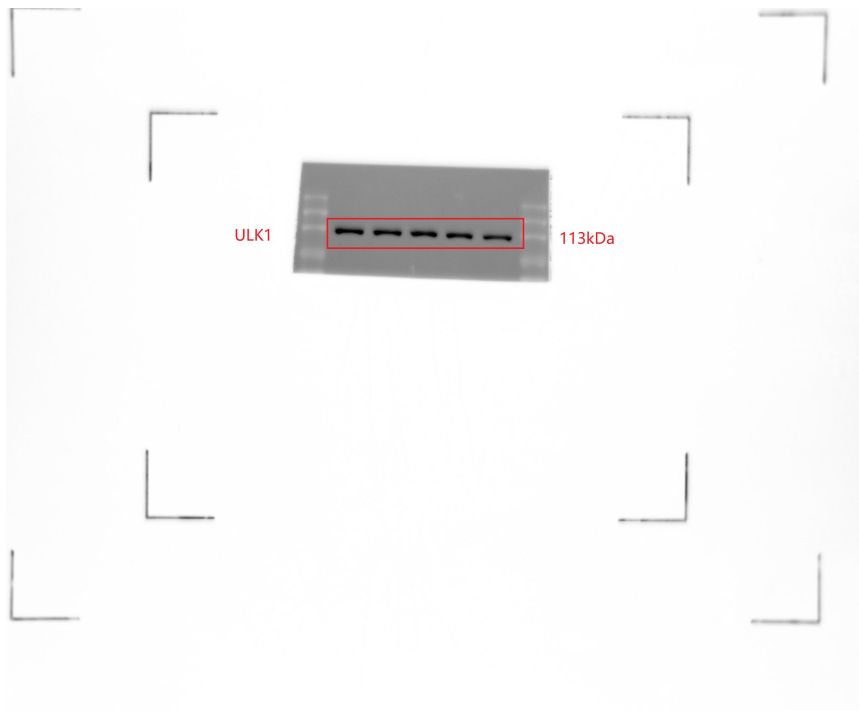

Figure 2J: p-ULK1(S757) expression of infarcted areas of rat myocardial tissues

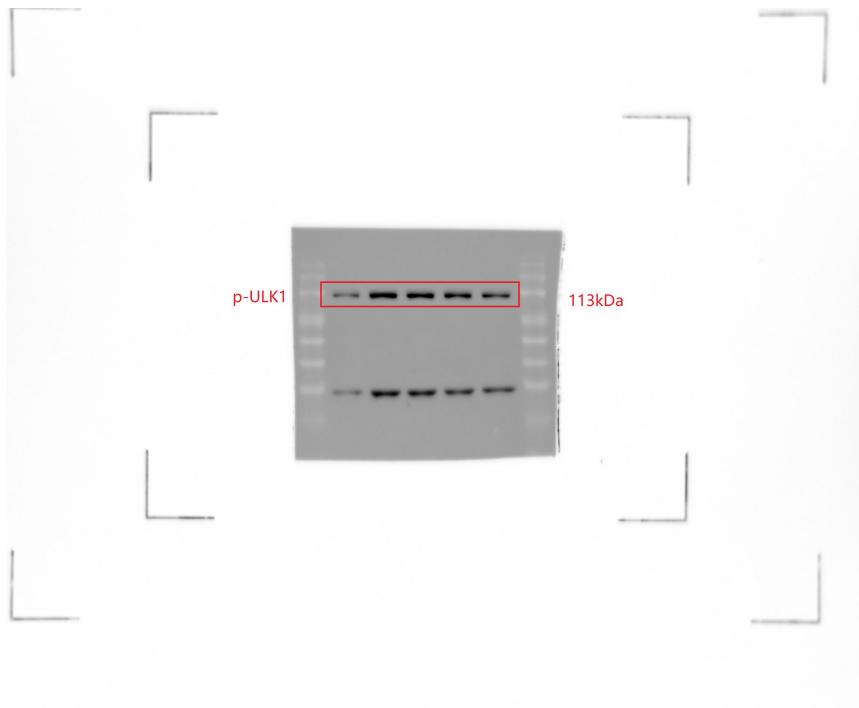

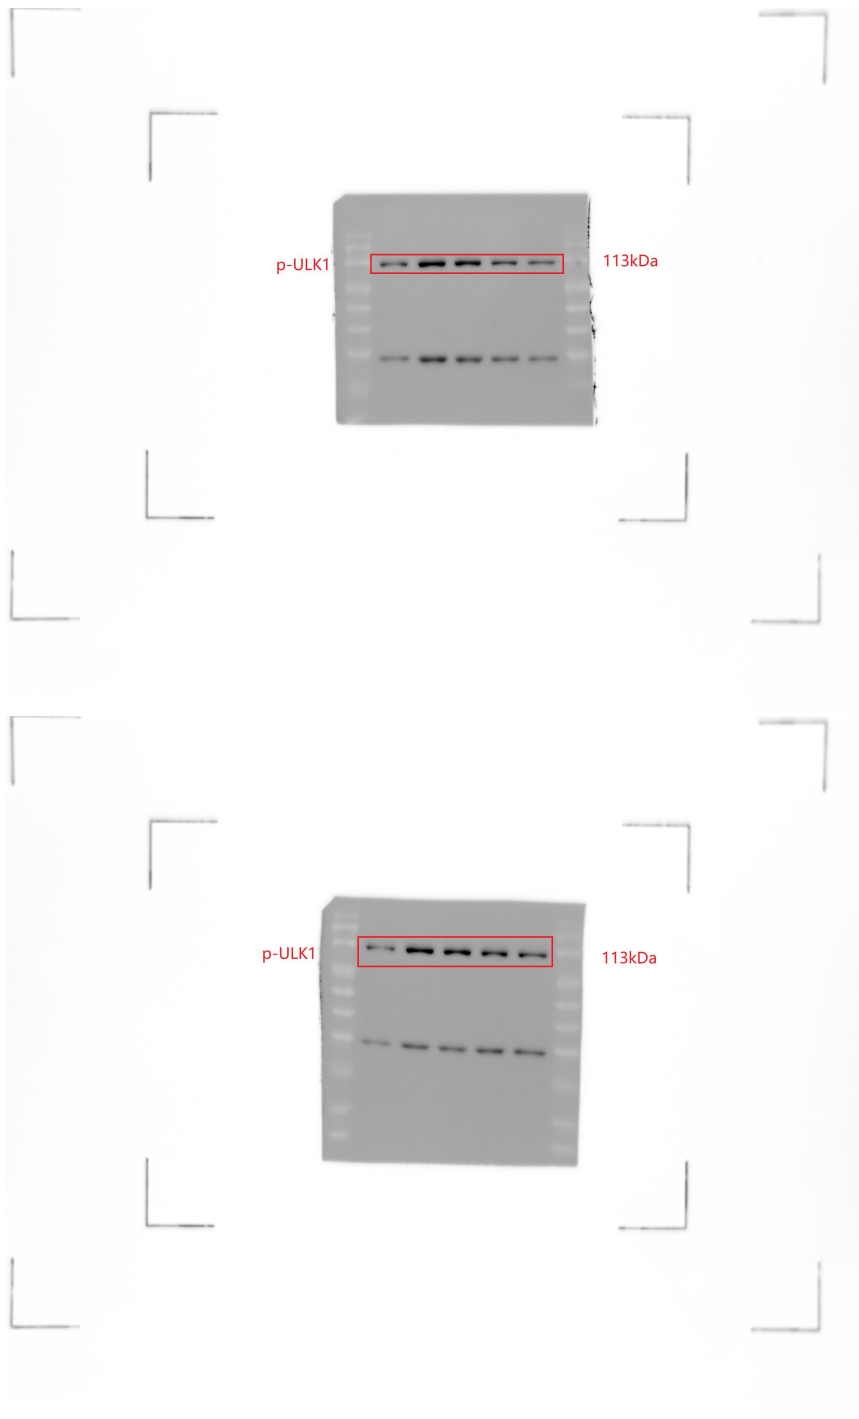

Figure 2K: GAPDH expression of infarcted areas of rat myocardial tissues



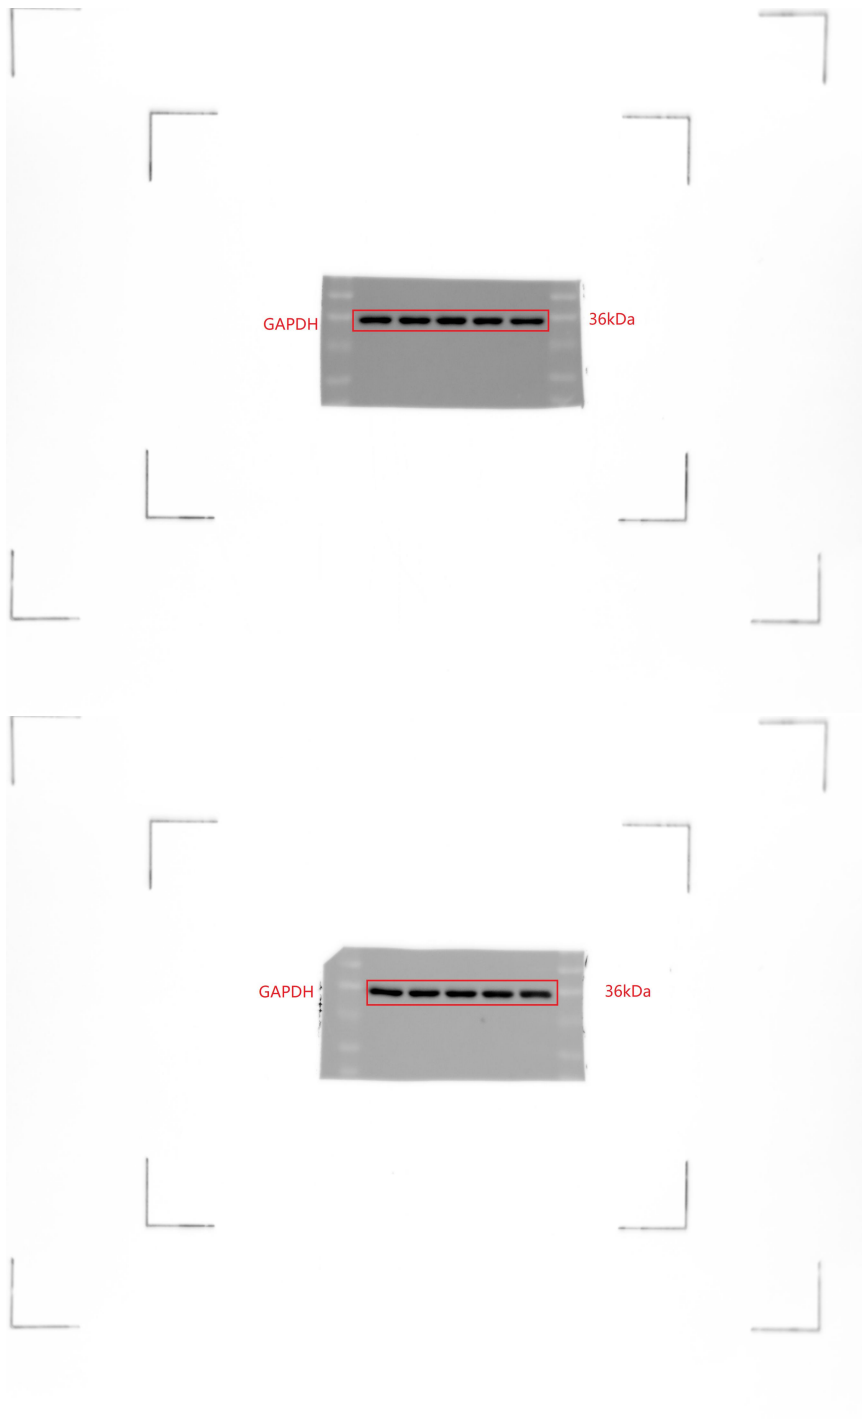

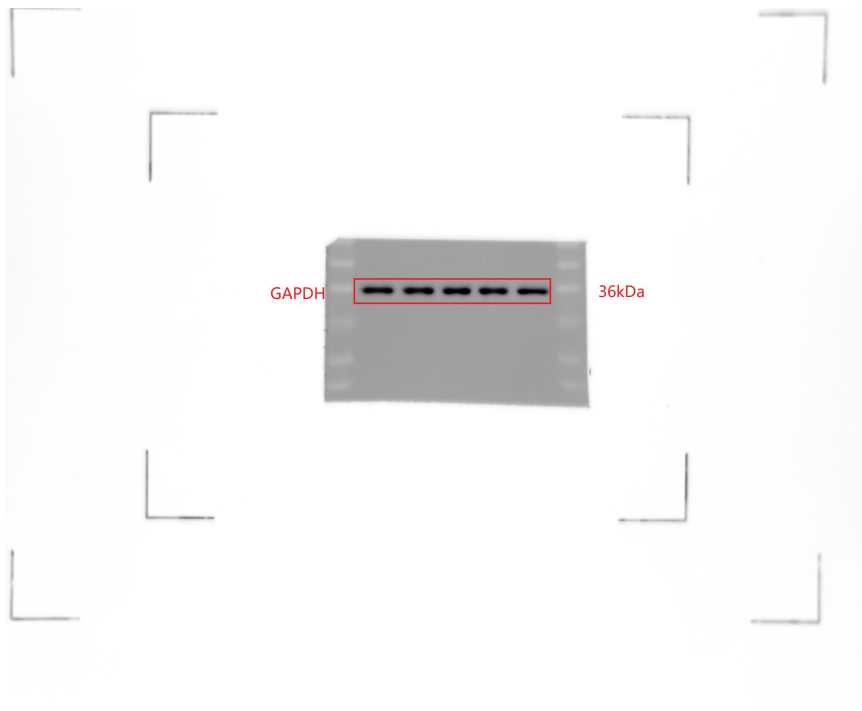

Supplement: 12872_2024_4054_MOESM1_ESM.pdf [file 12872_2024_4054_MOESM1_ESM.pdf]
